# Supplementary material for: How does open innovation lead competitive advantage? A dynamic capability view perspective
Source: PLoS One. 2019 Nov 20;14(11):e0223405. doi: 10.1371/journal.pone.0223405 (PMC6867631; doi:10.1371/journal.pone.0223405)
Supplement: S1 Dataset — (XLSX) [file pone.0223405.s002.xlsx]

## Sheet: DC_Data1607231013_plosone
		Control	control		Control			Competitive Advantage		Seizing Capability_inverse scale					Sensing Capability_inverse scale							Product Innovation Performance_inverse scale				Transforming Capability_inverse scale
Id	Q2_1_3 (Sales)	Qq3_1_3 (no. of Employees)	Sales per Employees (=Q2_1_3/ Qq3_1_3)	Qq19t (Innovation expenditure)	Innovation Expenditure per Employees (=Qq19t / Qq3_1_3)	Qq12_1 (sales ratio of inno. Prod., type #1)	Qq12_2 (sales ratio of inno. Prod., Type #2)	InnoRatio (=Qq12_1+Qq12_2)	InnoSalesperEmp (= a*b/c) - a : InnoRatio - b : Sales (=Q2_1_3) - c : no. of Employees (= Qq3_1_3)	Q18_2 (Collaborative R&D)	Q18_3 (External R&D contract)	Q18_4 (Machine or Software acquisition)	Q18_5 (External knowledge acquisition)	Q18_8 (New Design)	Q21b2 (Suppliers)	Q21b3 (Customers (private sector))	Q21b4 (Customers (public sector))	Q21b5 (Competitors (or other firms))	Q21b6 (Private services (consulting))	Q21b7 (Universities)	Q21b8 (Public/Private R&D institutions)	Q26b1 (Variety of products)	Q26b2 (Replacement of old products)	Q26b3 (Early market entrants)	Q26b4 (Quality enhancement of products)	Q29_1 (Business practices)	Q29_2 (Workplace organization)	Q29_3 (External relations)	Q30_3 (Product placement)
2	6	184	0.0326087	4400	23.913	0	10	10	0.326087	0	0	0	0	1	2	3	2	0	0	0	2	3	2	1	3	0	0	0	0
9	4	46	0.0869565	100	2.17391	0	0	0	0	0	0	1	0	0	0	0	0	2	0	0	0	2	2	2	1	1	0	0	0
20	1	10	0.1	50	5	0	10	10	1	1	1	1	0	1	2	0	0	0	0	0	0	2	2	2	2	0	0	0	0
25	3	30	0.1	500	16.6667	0	0	0	0	1	0	0	0	1	1	1	1	2	3	2	1	2	2	3	2	1	1	1	0
26	2	10	0.2	10	1	0	20	20	4	0	0	0	0	1	3	3	0	3	0	0	0	3	3	3	3	1	1	0	0
29	3	70	0.0428571	3	0.0428571	0	2	2	0.0857143	0	0	1	0	1	3	3	0	0	0	0	0	2	0	0	2	1	1	0	0
30	6	335	0.0179104	2722	8.12537	0	0	0	0	1	0	1	0	1	0	0	0	0	0	2	0	0	0	1	2	1	1	0	0
32	4	57	0.0701754	15	0.263158	0	0	0	0	0	0	0	0	0	0	0	0	0	0	0	0	0	0	0	0	0	0	0	0
34	4	257	0.0155642	55	0.214008	0	40	40	0.622568	0	0	0	0	1	0	3	0	2	0	0	0	2	0	2	3	0	1	0	1
52	5	283	0.0176678	3000	10.6007	0	1	1	0.0176678	0	0	1	0	0	0	3	0	0	0	0	0	3	3	0	0	0	0	0	0
53	6	108	0.0555556	49	0.453704	10	0	10	0.555556	0	0	1	0	1	0	0	0	2	0	0	0	2	0	2	0	0	1	0	0
56	6	294	0.0204082	3900	13.2653	0	4	4	0.0816327	0	0	0	0	0	0	0	0	0	0	0	0	0	0	2	2	0	0	0	0
68	4	400	0.01	200	0.5	0	5	5	0.05	0	0	1	1	1	3	0	0	0	0	0	0	3	0	0	3	0	0	0	1
69	6	1300	0.00461538	1500	1.15385	5	5	10	0.0461538	0	0	0	0	1	0	0	0	0	0	0	0	3	3	3	3	1	1	1	1
72	6	2012	0.00298211	10000	4.97018	5	5	10	0.0298211	0	0	1	0	1	0	3	0	0	0	0	0	3	3	3	2	1	1	1	1
73	6	530	0.0113208	1763	3.32642	0	30	30	0.339623	1	0	1	0	1	3	3	0	3	0	0	3	0	0	0	3	0	0	0	0
75	6	1100	0.00545455	2000	1.81818	20	80	100	0.545455	1	1	1	1	1	2	2	0	2	2	0	0	3	3	2	2	1	1	1	0
77	6	1100	0.00545455	9862	8.96545	3	2	5	0.0272727	1	1	1	1	1	3	3	2	3	2	2	2	3	2	2	3	1	1	1	0
80	6	532	0.0112782	1021	1.91917	0	9	9	0.101504	1	0	1	1	1	2	3	0	3	2	1	1	1	1	1	1	1	1	0	0
82	6	799	0.00750939	21663	27.1126	7	27	34	0.255319	1	1	1	1	1	3	0	2	0	0	2	2	2	0	1	1	1	1	0	0
83	6	1822	0.00329308	10000	5.48847	0	0	0	0	1	1	1	0	1	0	0	0	3	3	3	0	3	0	0	3	1	1	1	0
87	5	680	0.00735294	810	1.19118	0	0	0	0	0	0	1	0	0	0	2	0	2	0	0	0	3	3	2	0	0	1	0	0
90	6	626	0.00958466	1418	2.26518	0	7	7	0.0670927	1	0	1	0	1	3	3	0	3	0	2	3	2	2	3	3	1	1	0	0
91	3	30	0.1	100	3.33333	10	0	10	1	0	0	0	0	0	0	0	0	0	0	0	0	3	0	0	0	0	0	0	0
92	4	680	0.00588235	200	0.294118	0	0	0	0	1	1	1	1	0	0	0	0	0	0	3	0	3	3	2	0	0	0	0	0
95	3	380	0.00789474	500	1.31579	30	0	30	0.236842	0	0	1	0	1	0	0	0	0	0	0	0	3	3	3	3	0	0	0	0
96	6	977	0.00614125	1000	1.02354	0	0	0	0	1	1	0	0	0	2	2	2	2	2	2	2	0	0	2	2	1	1	0	0
97	6	540	0.0111111	11000	20.3704	1	5	6	0.0666667	0	0	1	0	1	3	0	0	3	2	0	2	3	2	3	3	1	1	1	1
98	6	377	0.0159151	10	0.0265252	2	0	2	0.0318302	0	0	0	0	1	0	0	0	0	0	0	0	1	2	1	2	1	1	1	0
100	6	708	0.00847458	1000	1.41243	0	0	0	0	1	0	1	0	1	0	0	0	0	0	0	0	0	0	2	0	0	0	0	0
102	6	3296	0.00182039	44156	13.3968	0	43	43	0.0782767	1	1	1	1	1	3	3	0	3	3	3	0	2	2	3	3	1	1	1	1
110	6	650	0.00923077	11250	17.3077	1	1	2	0.0184615	1	1	1	1	1	2	3	3	3	2	3	3	2	3	3	3	1	1	1	1
115	4	255	0.0156863	30	0.117647	0	50	50	0.784314	0	0	0	0	0	3	0	0	0	0	0	0	0	3	0	0	0	0	0	0
117	2	30	0.0666667	400	13.3333	0	20	20	1.33333	1	0	0	0	1	0	0	0	0	0	3	0	3	3	3	3	0	0	0	0
121	3	45	0.0666667	1500	33.3333	0	30	30	2	1	0	1	0	1	0	3	0	0	0	0	0	3	3	3	3	0	0	0	0
122	6	356	0.0168539	2800	7.86517	0	10	10	0.168539	1	1	1	1	1	2	2	0	2	1	1	1	3	0	3	3	1	1	1	0
140	6	903	0.00664452	4283	4.74308	7	5	12	0.0797342	1	1	1	0	1	3	3	0	3	0	3	0	3	3	3	3	1	1	1	1
141	6	582	0.0103093	3300	5.6701	0	20	20	0.206186	0	0	1	0	1	3	0	0	0	0	0	2	3	0	0	3	0	0	0	0
147	6	840	0.00714286	4260	5.07143	0	15	15	0.107143	1	1	1	0	1	2	0	1	1	1	2	3	3	0	0	3	1	1	1	0
149	6	541	0.0110906	471	0.87061	0	10	10	0.110906	0	0	0	0	1	0	3	0	3	0	0	0	3	0	3	3	0	0	0	0
157	4	100	0.04	1000	10	0	30	30	1.2	0	0	0	0	0	0	0	0	0	0	0	0	3	2	3	3	0	0	0	0
161	3	130	0.0230769	500	3.84615	0	50	50	1.15385	0	0	0	0	1	2	0	0	0	0	0	0	3	0	3	0	0	0	0	0
182	5	104	0.0480769	1500	14.4231	0	0	0	0	0	0	0	0	1	0	3	0	0	0	0	0	2	2	2	2	0	0	0	1
194	6	265	0.0226415	3000	11.3208	80	20	100	2.26415	0	0	0	0	1	1	2	0	0	0	0	0	3	0	3	3	0	0	0	0
197	6	512	0.0117188	1000	1.95312	0	5	5	0.0585938	0	0	1	0	1	0	1	0	0	3	0	0	2	0	2	2	1	1	0	0
199	6	390	0.0153846	20000	51.2821	0	5	5	0.0769231	0	0	0	0	1	2	0	0	0	0	0	0	3	3	2	3	0	1	0	1
203	6	650	0.00923077	2000	3.07692	0	0	0	0	1	1	0	0	1	0	3	0	0	0	0	0	2	3	3	3	1	1	1	1
204	6	288	0.0208333	15928	55.3056	0	10	10	0.208333	0	0	1	0	1	0	3	0	2	0	0	0	2	2	0	3	0	1	0	0
227	2	25	0.08	500	20	30	0	30	2.4	0	0	0	0	0	2	0	0	0	2	0	0	2	0	3	0	0	0	0	0
228	1	35	0.0285714	123	3.51429	0	0	0	0	0	0	1	0	1	2	0	0	0	0	0	0	2	0	2	2	0	1	0	0
229	2	26	0.0769231	36	1.38462	0	0	0	0	0	0	0	0	1	0	2	0	0	0	0	0	2	2	2	2	0	0	0	1
230	4	25	0.16	10	0.4	0	20	20	3.2	0	0	0	0	1	2	2	2	2	2	2	2	3	3	3	3	1	1	1	1
232	4	51	0.0784314	100	1.96078	0	50	50	3.92157	0	0	1	1	1	0	2	0	2	2	0	0	2	2	2	2	0	1	0	1
240	6	773	0.00776197	400	0.517464	0	0	0	0	0	0	0	0	1	0	3	0	2	0	0	0	2	0	2	0	0	0	0	0
242	2	12	0.166667	20	1.66667	0	0	0	0	1	0	1	1	1	3	0	0	2	0	0	0	3	1	2	2	1	1	1	1
254	2	44	0.0454545	200	4.54545	0	30	30	1.36364	0	0	0	0	1	3	0	0	0	0	0	0	2	2	3	0	0	0	0	0
255	2	32	0.0625	220	6.875	0	30	30	1.875	0	0	0	0	0	0	3	0	0	0	0	0	0	0	3	0	0	0	0	0
257	2	20	0.1	200	10	0	50	50	5	0	0	0	0	0	3	0	0	2	0	0	0	2	2	3	0	0	0	0	0
259	2	30	0.0666667	1000	33.3333	0	70	70	4.66667	0	0	1	0	0	0	0	0	3	0	0	3	0	0	3	0	0	0	0	0
263	3	20	0.15	910	45.5	0	3	3	0.45	1	0	0	0	0	3	3	0	3	0	0	0	3	3	3	3	0	0	0	0
264	2	34	0.0588235	1200	35.2941	0	0	0	0	0	1	0	0	0	3	3	3	3	0	0	0	3	0	3	3	1	0	0	1
270	2	10	0.2	250	25	0	5	5	1	1	0	0	0	0	0	0	0	0	0	0	2	2	0	0	2	0	1	1	0
271	4	41	0.097561	999	24.3659	5	1	6	0.585366	0	0	1	0	0	0	0	0	0	0	0	0	3	2	2	2	0	1	0	0
273	2	10	0.2	75	7.5	0	0	0	0	1	0	1	1	0	2	2	0	0	0	2	2	2	2	2	2	1	0	0	1
275	4	16	0.25	139	8.6875	0	0	0	0	1	1	0	0	0	3	0	0	1	0	1	0	3	3	3	3	1	1	0	0
278	3	70	0.0428571	600	8.57143	0	30	30	1.28571	0	0	0	1	1	0	0	0	0	0	0	0	3	3	3	0	0	0	0	0
279	4	39	0.102564	600	15.3846	0	10	10	1.02564	0	0	1	0	1	3	3	0	3	0	0	0	0	3	3	3	1	1	1	0
281	6	62	0.0967742	400	6.45161	0	0	0	0	0	0	1	0	0	0	2	2	2	0	0	0	0	2	0	3	1	1	0	0
283	5	120	0.0416667	500	4.16667	1	0	1	0.0416667	0	0	0	0	0	0	0	3	0	0	2	2	3	3	3	3	1	0	0	0
284	6	300	0.02	10000	33.3333	10	10	20	0.4	0	1	1	0	0	2	0	0	0	0	2	2	3	1	2	3	0	1	1	1
286	6	240	0.025	3234	13.475	0	40	40	1	1	0	1	1	1	3	3	0	2	0	0	0	2	2	2	2	1	1	0	1
288	5	200	0.025	2400	12	0	0	0	0	0	0	1	0	0	3	3	0	3	0	0	0	3	3	3	3	0	0	0	0
293	6	130	0.0461538	20000	153.846	0	0	0	0	0	0	1	0	1	0	2	0	0	2	0	0	0	0	2	2	1	0	0	0
296	6	352	0.0170455	5000	14.2045	20	80	100	1.70455	0	0	0	0	0	3	3	0	2	0	0	0	2	2	2	2	1	1	0	1
297	6	750	0.008	5000	6.66667	10	0	10	0.08	0	0	1	0	0	0	0	0	2	0	0	0	2	2	0	2	0	0	0	0
299	2	23	0.0869565	500	21.7391	0	0	0	0	1	0	0	0	0	0	0	0	0	0	0	0	0	0	0	0	0	0	0	0
302	3	38	0.0789474	6000	157.895	0	2	2	0.157895	1	1	1	0	1	2	2	2	0	0	0	3	2	0	2	2	0	1	1	1
304	5	280	0.0178571	7000	25	0	10	10	0.178571	1	0	0	1	0	0	0	0	0	0	0	0	3	0	0	0	0	0	0	0
305	5	180	0.0277778	1000	5.55556	0	0	0	0	0	0	0	0	0	0	0	0	0	0	0	0	0	0	0	2	0	0	0	0
306	4	229	0.0174672	500	2.18341	0	10	10	0.174672	0	0	0	0	0	0	0	0	0	0	0	0	2	0	0	0	0	0	0	0
308	5	270	0.0185185	1750	6.48148	0	0	0	0	1	0	0	0	0	0	0	0	0	0	0	2	0	0	0	0	0	0	0	0
309	3	99	0.030303	7121	71.9293	0	100	100	3.0303	1	1	1	0	1	0	0	2	2	0	0	2	0	0	3	2	1	1	1	0
311	6	1500	0.004	30000	20	5	5	10	0.04	1	0	1	1	1	0	3	0	0	0	0	0	3	3	3	3	1	1	1	1
312	6	600	0.01	1000	1.66667	10	10	20	0.2	0	0	1	0	1	0	0	0	0	0	3	0	3	3	3	3	0	1	1	1
313	6	480	0.0125	1000	2.08333	5	5	10	0.125	0	0	1	0	1	0	0	0	0	0	3	0	3	3	3	3	0	1	1	1
314	5	392	0.0127551	3000	7.65306	0	10	10	0.127551	1	1	1	1	1	0	0	0	2	3	3	2	3	3	1	3	0	0	1	0
316	6	1300	0.00461538	7000	5.38462	10	10	20	0.0923077	1	1	1	1	1	0	3	0	0	0	0	0	3	3	3	3	1	1	1	1
317	6	1923	0.00312012	15000	7.80031	10	10	20	0.0624025	1	1	1	0	1	0	0	0	0	0	3	0	2	2	3	3	1	1	1	1
331	3	27	0.111111	87	3.22222	0	15	15	1.66667	1	1	1	0	1	0	0	2	0	0	2	2	0	2	0	0	1	1	0	0
333	3	43	0.0697674	300	6.97674	10	0	10	0.697674	0	0	0	0	0	0	0	0	0	0	0	0	0	0	1	3	0	0	0	0
334	1	18	0.0555556	100	5.55556	0	0	0	0	0	0	1	0	0	0	0	0	0	0	0	0	0	2	0	0	0	0	0	0
336	4	31	0.129032	300	9.67742	60	0	60	7.74194	0	0	1	0	1	0	0	0	0	0	0	0	3	0	0	3	0	0	0	0
339	2	16	0.125	200	12.5	0	0	0	0	0	0	0	0	0	0	0	0	0	0	0	0	0	3	0	2	1	0	0	0
341	2	20	0.1	50	2.5	0	0	0	0	0	0	1	0	0	3	3	0	0	0	0	2	0	0	0	3	0	0	0	0
349	4	40	0.1	200	5	0	40	40	4	0	0	0	0	1	0	0	0	0	0	0	0	0	0	0	3	0	1	0	0
363	2	22	0.0909091	40	1.81818	10	0	10	0.909091	0	0	1	0	1	0	0	0	0	0	0	0	0	0	3	3	0	0	0	0
371	2	20	0.1	50	2.5	25	0	25	2.5	1	0	0	0	1	0	3	0	0	0	0	0	3	3	0	3	0	0	1	0
377	4	60	0.0666667	400	6.66667	0	0	0	0	0	0	0	0	1	0	0	0	0	0	0	0	0	0	2	2	0	1	0	0
379	2	103	0.0194175	100	0.970874	0	40	40	0.776699	0	0	1	0	0	0	0	0	0	0	0	0	0	0	2	3	0	1	0	0
383	4	120	0.0333333	1400	11.6667	0	0	0	0	0	0	1	0	1	0	0	0	0	0	0	0	3	3	3	3	1	1	0	1
385	5	160	0.03125	800	5	0	0	0	0	0	0	1	0	1	3	3	3	0	0	0	0	3	3	3	3	1	1	0	0
386	4	200	0.02	1000	5	5	0	5	0.1	1	0	1	1	1	0	0	0	0	0	3	0	3	3	3	3	0	0	0	0
387	4	100	0.04	1800	18	0	0	0	0	0	0	1	0	0	0	0	0	0	0	0	0	0	0	0	3	0	1	0	0
392	5	160	0.03125	1000	6.25	0	0	0	0	0	0	1	0	0	0	0	0	0	0	0	0	0	3	0	0	1	1	0	0
393	5	180	0.0277778	120	0.666667	0	0	0	0	0	0	1	0	0	0	0	0	0	0	0	0	0	0	2	3	1	1	0	0
394	4	150	0.0266667	700	4.66667	0	0	0	0	0	0	0	0	0	0	0	0	0	0	0	0	0	2	0	0	1	1	0	1
395	6	230	0.026087	600	2.6087	0	0	0	0	0	0	0	0	1	0	0	0	0	0	0	0	0	0	0	2	0	1	0	0
397	3	220	0.0136364	1800	8.18182	0	0	0	0	0	0	1	0	0	0	0	0	0	0	0	0	0	3	0	2	0	1	0	0
398	5	200	0.025	400	2	0	0	0	0	0	0	0	0	1	0	0	0	0	0	0	0	0	0	2	3	1	1	0	0
400	4	80	0.05	500	6.25	0	0	0	0	0	0	1	0	0	0	0	0	0	0	0	0	0	2	0	2	0	1	0	0
401	4	119	0.0336134	2170	18.2353	0	30	30	1.0084	1	0	1	1	1	3	3	0	0	0	0	0	3	0	3	2	1	1	1	0
410	6	400	0.015	6000	15	70	0	70	1.05	0	0	1	0	1	0	0	0	0	0	0	0	3	2	2	3	0	1	0	0
411	6	800	0.0075	10000	12.5	5	10	15	0.1125	1	1	1	0	0	0	0	0	0	0	0	3	3	3	3	3	1	1	1	1
412	6	1067	0.00562324	2400	2.2493	0	20	20	0.112465	0	0	1	0	1	1	0	0	2	0	1	2	2	3	2	2	0	0	0	0
413	6	600	0.01	30000	50	10	15	25	0.25	1	1	1	1	1	0	3	0	0	0	0	2	3	3	3	3	1	1	1	0
416	2	30	0.0666667	1600	53.3333	0	30	30	2	0	0	1	0	1	0	0	0	0	0	0	0	3	3	3	3	0	0	0	0
417	3	24	0.125	100	4.16667	5	10	15	1.875	0	0	1	0	0	0	0	0	0	0	0	0	0	0	2	2	1	0	0	0
425	2	27	0.0740741	40	1.48148	0	0	0	0	0	0	0	0	0	0	0	0	0	0	0	0	0	0	0	0	0	0	0	0
426	3	32	0.09375	400	12.5	0	5	5	0.46875	0	1	0	0	1	2	0	0	1	2	0	0	2	2	2	2	0	0	0	0
445	6	780	0.00769231	1000	1.28205	0	0	0	0	0	0	0	0	0	0	0	0	0	0	0	0	0	0	3	2	0	0	0	0
446	6	558	0.0107527	1000	1.79211	0	10	10	0.107527	0	0	0	0	1	3	2	0	1	0	2	1	3	3	2	3	0	0	0	0
447	6	1300	0.00461538	8300	6.38462	0	10	10	0.0461538	1	0	1	0	0	0	3	0	0	0	0	0	3	3	3	3	1	1	1	0
478	4	118	0.0338983	300	2.54237	0	20	20	0.677966	1	1	1	0	0	2	3	0	0	0	0	2	3	2	3	2	1	1	1	0
484	6	228	0.0263158	1307	5.73246	0	0	0	0	1	1	1	0	0	2	2	0	3	2	3	0	0	3	0	3	1	1	1	0
489	6	295	0.020339	2000	6.77966	50	0	50	1.01695	1	0	1	0	0	2	0	0	3	2	2	0	2	3	2	0	1	1	1	0
493	6	1600	0.00375	10000	6.25	0	0	0	0	0	0	1	0	0	0	3	0	0	0	0	0	2	3	2	3	1	1	1	1
501	3	25	0.12	100	4	10	0	10	1.2	0	0	0	0	0	0	0	0	2	0	0	0	0	2	0	2	0	0	0	0
515	4	104	0.0384615	1100	10.5769	0	20	20	0.769231	0	0	0	0	0	0	0	0	0	0	0	0	3	2	2	3	0	0	0	0
524	2	12	0.166667	250	20.8333	0	5	5	0.833333	0	1	0	0	0	0	3	0	0	0	0	0	0	0	2	3	0	0	0	0
546	2	30	0.0666667	60	2	0	40	40	2.66667	0	0	0	0	0	0	3	0	0	0	0	0	0	0	0	3	0	0	0	0
547	3	40	0.075	100	2.5	0	0	0	0	1	1	1	0	0	1	2	0	1	0	0	0	2	1	1	2	1	0	1	0
552	2	27	0.0740741	45	1.66667	0	20	20	1.48148	0	0	0	0	0	0	3	0	0	0	0	0	0	0	0	3	0	0	0	0
560	2	19	0.105263	30	1.57895	0	0	0	0	0	0	0	0	0	0	2	0	0	0	0	0	0	0	0	3	0	0	0	0
561	2	14	0.142857	50	3.57143	0	30	30	4.28571	0	0	0	0	1	0	0	0	0	0	0	0	0	2	0	3	0	0	0	0
575	2	20	0.1	20	1	0	10	10	1	0	0	0	0	0	0	3	0	0	0	0	0	0	0	0	2	0	0	0	0
587	4	42	0.0952381	70	1.66667	0	0	0	0	0	0	0	0	0	0	3	0	3	0	0	0	2	2	2	2	0	0	0	0
589	4	40	0.1	800	20	0	20	20	2	0	0	0	0	0	3	3	0	3	0	0	0	2	2	2	2	0	0	0	0
592	2	29	0.0689655	100	3.44828	0	0	0	0	0	0	0	0	1	0	3	0	3	0	0	0	3	3	2	2	0	0	0	0
594	3	13	0.230769	200	15.3846	0	0	0	0	0	0	0	0	0	0	3	0	3	0	0	0	2	2	2	2	0	0	0	0
595	3	17	0.176471	100	5.88235	0	0	0	0	0	0	0	0	0	3	3	0	3	0	0	0	2	2	2	2	0	0	0	0
600	4	35	0.114286	150	4.28571	0	0	0	0	0	0	0	0	0	3	3	0	3	0	0	0	2	2	2	2	0	0	0	0
609	2	14	0.142857	20	1.42857	10	30	40	5.71429	0	0	0	0	1	0	3	3	0	0	0	0	0	0	3	3	1	1	1	0
610	2	18	0.111111	40	2.22222	0	0	0	0	0	0	1	1	0	2	0	2	2	0	0	0	0	3	0	0	1	1	1	0
611	3	22	0.136364	5	0.227273	0	0	0	0	0	0	0	0	0	0	0	0	0	0	0	0	0	0	0	0	1	0	0	0
612	4	56	0.0714286	200	3.57143	0	50	50	3.57143	0	0	0	0	1	0	0	0	0	0	0	0	0	0	2	3	0	1	0	0
613	3	70	0.0428571	212	3.02857	0	0	0	0	0	0	1	0	0	0	2	0	0	0	0	0	0	0	0	2	0	0	0	0
615	3	65	0.0461538	200	3.07692	0	5	5	0.230769	0	0	0	0	1	0	0	0	0	0	0	0	2	0	2	3	0	0	0	0
617	5	56	0.0892857	105	1.875	0	10	10	0.892857	0	0	0	0	0	0	0	0	0	0	0	0	0	0	0	3	0	0	0	0
622	4	44	0.0909091	9999	227.25	0	0	0	0	0	0	0	0	0	3	3	0	3	0	0	0	2	2	2	2	0	0	0	0
623	4	80	0.05	9999	124.987	0	0	0	0	0	0	0	0	0	3	3	3	3	0	0	0	2	2	2	2	0	0	0	0
624	3	120	0.025	1000	8.33333	30	0	30	0.75	0	0	0	0	0	0	0	0	0	0	0	0	3	3	0	0	0	0	0	0
626	4	100	0.04	2000	20	0	20	20	0.8	0	0	1	0	0	0	0	0	0	0	0	0	0	3	1	3	0	0	0	0
628	6	200	0.03	1500	7.5	0	0	0	0	0	0	0	0	0	0	0	0	0	0	0	0	1	1	0	1	0	0	0	0
629	4	100	0.04	200	2	0	0	0	0	0	0	0	0	0	0	0	0	0	0	0	0	2	0	2	2	0	0	0	0
630	4	120	0.0333333	250	2.08333	30	0	30	1	0	0	0	0	0	0	0	0	0	0	0	0	0	3	0	3	0	0	0	0
633	5	131	0.0381679	76	0.580153	0	0	0	0	0	0	0	0	0	0	0	0	0	0	0	0	0	2	0	0	0	1	0	0
634	4	196	0.0204082	311	1.58673	1	10	11	0.22449	0	0	0	0	0	0	0	0	0	0	0	0	2	2	2	2	1	1	0	0
635	5	109	0.0458716	300	2.75229	10	30	40	1.83486	1	0	0	0	1	0	0	0	0	3	2	2	2	3	2	3	1	1	1	0
639	5	100	0.05	300	3	0	0	0	0	0	0	0	0	1	0	0	0	0	0	0	0	0	2	1	2	0	1	0	0
641	4	105	0.0380952	100	0.952381	0	0	0	0	0	0	0	0	0	0	0	0	0	0	0	0	0	0	0	0	1	1	0	0
642	4	114	0.0350877	132	1.15789	0	10	10	0.350877	1	0	0	0	1	0	2	0	2	0	2	0	0	2	0	3	0	0	0	0
647	4	109	0.0366972	999	9.16514	0	0	0	0	0	0	0	0	0	0	3	0	2	0	0	0	2	2	1	2	0	0	0	0
650	5	329	0.0151976	10000	30.3951	25	0	25	0.379939	0	0	0	0	0	0	0	0	0	0	0	0	3	3	3	3	0	0	0	0
651	5	229	0.0218341	450	1.96507	0	50	50	1.0917	0	0	1	0	0	3	3	0	3	0	0	0	2	2	2	2	0	0	0	0
652	6	676	0.00887574	20000	29.5858	3	0	3	0.0266272	0	0	1	1	1	0	3	0	2	0	0	0	3	3	2	1	0	0	0	0
654	6	1415	0.00424028	8300	5.86572	0	15	15	0.0636042	0	0	0	0	0	1	1	0	0	0	2	3	3	3	2	3	0	0	0	0
655	6	711	0.00843882	93	0.130802	10	5	15	0.126582	1	1	1	1	1	0	2	0	0	0	2	2	3	3	3	3	1	1	1	1
658	2	15	0.133333	300	20	40	0	40	5.33333	0	0	0	0	1	0	3	0	2	0	0	0	0	0	2	2	0	0	0	0
660	3	28	0.107143	1400	50	0	80	80	8.57143	0	0	0	0	0	0	3	0	0	0	0	0	0	3	2	0	0	0	0	0
661	2	18	0.111111	70	3.88889	40	50	90	10	0	0	0	1	0	0	0	0	3	0	0	0	0	0	3	0	0	0	0	0
662	2	15	0.133333	100	6.66667	15	30	45	6	0	0	1	0	1	0	0	0	3	0	0	0	3	0	3	0	0	0	0	1
663	3	45	0.0666667	100	2.22222	20	40	60	4	0	0	0	0	0	0	3	0	0	0	0	0	3	3	3	0	0	0	0	0
665	3	27	0.111111	50	1.85185	0	0	0	0	0	0	1	0	0	0	3	0	0	0	0	0	0	0	2	2	0	0	0	0
666	2	20	0.1	300	15	8	60	68	6.8	1	1	0	0	1	0	0	0	0	0	0	0	3	3	3	2	1	1	1	0
667	3	41	0.0731707	581	14.1707	15	0	15	1.09756	0	0	1	0	1	2	0	0	0	0	0	0	0	0	2	0	1	1	1	1
670	2	29	0.0689655	324	11.1724	70	0	70	4.82759	0	1	1	0	1	1	0	2	1	0	0	0	3	3	1	3	0	1	0	0
675	2	34	0.0588235	150	4.41176	0	10	10	0.588235	1	0	1	0	1	0	2	0	0	2	2	0	0	2	3	3	1	1	1	0
685	3	50	0.06	1000	20	0	0	0	0	0	1	1	0	0	0	3	0	0	0	0	0	0	0	2	0	0	0	0	1
686	4	83	0.0481928	400	4.81928	0	0	0	0	0	0	0	0	0	0	2	0	0	0	0	0	0	3	2	0	0	1	0	0
689	4	80	0.05	1000	12.5	0	0	0	0	1	0	1	0	1	3	3	3	3	0	0	0	3	3	3	3	1	1	0	1
693	3	102	0.0294118	100	0.980392	0	20	20	0.588235	0	0	0	0	0	2	2	0	0	0	2	0	3	3	3	3	0	0	0	0
694	4	75	0.0533333	200	2.66667	0	0	0	0	0	0	1	0	0	1	1	0	1	1	1	1	1	2	3	2	1	1	1	0
695	6	241	0.0248963	10000	41.4938	5	0	5	0.124481	1	1	1	1	1	2	2	0	2	0	0	2	0	2	3	2	1	1	1	1
696	4	150	0.0266667	1700	11.3333	8	25	33	0.88	1	0	1	1	1	0	2	0	2	0	1	0	0	0	3	3	0	0	0	0
697	5	124	0.0403226	400	3.22581	0	0	0	0	0	0	1	0	0	0	0	3	0	0	0	0	0	0	2	0	0	0	0	0
698	5	160	0.03125	7500	46.875	0	0	0	0	1	0	1	0	0	0	3	0	3	0	0	0	0	0	0	2	0	0	0	0
699	5	200	0.025	50	0.25	0	0	0	0	0	0	0	0	0	0	0	0	2	0	0	0	0	0	0	2	0	1	0	1
700	5	143	0.034965	100	0.699301	0	0	0	0	0	0	0	0	0	0	3	0	0	0	0	0	0	0	2	3	0	0	0	0
703	4	125	0.032	1000	8	0	0	0	0	1	0	1	0	0	0	3	0	2	0	1	0	0	0	0	3	0	1	0	0
704	2	150	0.0133333	270	1.8	0	0	0	0	0	0	0	0	0	0	2	0	1	0	0	0	3	3	3	2	0	1	0	0
705	5	195	0.025641	2000	10.2564	0	0	0	0	1	0	1	0	0	0	2	0	2	0	1	0	3	3	0	0	0	0	0	0
706	4	113	0.0353982	2820	24.9558	0	25	25	0.884956	1	0	1	0	1	0	2	0	2	0	2	2	3	3	3	3	1	1	1	1
707	5	150	0.0333333	6000	40	0	30	30	1	0	0	1	0	0	0	0	0	0	0	0	0	0	0	0	2	0	0	0	0
710	6	300	0.02	1000	3.33333	0	10	10	0.2	1	0	1	0	1	0	0	3	0	0	0	3	0	0	2	2	0	0	0	0
712	4	190	0.0210526	3000	15.7895	0	0	0	0	1	0	1	0	0	0	3	0	0	0	0	3	2	0	2	3	0	1	0	0
715	6	217	0.0276498	3021	13.9217	34	14	48	1.32719	1	1	1	1	1	2	3	0	2	0	2	2	1	2	2	2	0	0	1	0
720	5	150	0.0333333	1600	10.6667	0	80	80	2.66667	1	1	1	0	0	0	1	1	0	0	1	2	3	3	3	3	1	1	0	1
722	4	81	0.0493827	100	1.23457	0	52	52	2.5679	1	1	1	1	1	0	0	0	0	0	0	2	0	2	2	2	1	1	0	1
725	5	181	0.0276243	450	2.48619	0	0	0	0	1	0	0	0	1	2	2	0	0	0	0	0	2	3	3	3	1	1	1	0
728	5	326	0.0153374	3700	11.3497	0	0	0	0	1	0	1	0	0	0	2	0	2	0	0	0	3	3	2	3	0	1	0	0
729	6	203	0.0295567	134500	662.562	0	0	0	0	1	1	1	1	1	3	2	2	3	0	2	0	2	2	3	3	1	1	1	0
734	6	800	0.0075	100	0.125	0	20	20	0.15	0	0	1	0	0	0	0	0	0	0	0	0	2	2	2	2	1	1	0	0
735	6	991	0.00605449	40867	41.2381	0	71	71	0.429869	1	1	1	0	1	0	2	1	1	3	2	2	2	3	3	3	0	1	1	1
736	6	850	0.00705882	4000	4.70588	0	0	0	0	0	0	1	1	1	0	0	0	0	0	0	0	3	3	3	2	1	1	1	0
737	6	732	0.00819672	17000	23.224	0	0	0	0	0	0	0	0	0	2	2	0	0	0	1	1	3	3	1	3	0	0	0	0
738	6	2142	0.00280112	24687	11.5252	0	20	20	0.0560224	1	1	1	0	1	0	3	0	2	0	0	1	0	0	0	3	0	1	0	0
739	6	800	0.0075	1000	1.25	0	80	80	0.6	0	0	0	0	0	2	2	2	0	0	0	2	3	3	3	3	0	0	0	0
740	6	702	0.00854701	9148	13.0313	0	0	0	0	1	0	1	0	0	2	0	0	2	0	0	3	2	2	2	2	0	0	0	0
741	6	742	0.00808625	76200	102.695	0	60	60	0.485175	1	0	1	0	1	0	3	0	0	0	0	0	0	3	2	3	1	1	0	0
742	6	550	0.0109091	5000	9.09091	0	10	10	0.109091	1	0	0	0	0	0	3	0	0	0	0	0	2	2	2	2	0	0	0	0
743	6	2500	0.0024	40364	16.1456	0	0	0	0	0	0	0	0	0	0	3	0	0	0	0	0	0	0	0	2	0	1	1	0
744	6	970	0.00618557	8694	8.96289	0	10	10	0.0618557	1	0	1	0	1	1	3	0	2	0	0	1	0	3	3	3	0	1	0	0
745	6	1228	0.00488599	7609	6.19625	10	20	30	0.14658	1	0	1	0	0	0	3	0	0	0	0	0	3	0	3	0	1	1	1	0
746	4	324	0.0123457	1092	3.37037	0	50	50	0.617284	1	1	1	0	1	0	3	0	3	0	0	2	3	3	3	3	0	1	1	0
748	6	500	0.012	1000	2	20	0	20	0.24	1	1	1	0	1	2	2	2	2	2	2	2	0	2	2	2	0	0	1	1
749	6	1139	0.00526778	3500	3.07287	10	40	50	0.263389	0	0	0	0	1	2	3	0	1	0	1	2	3	3	2	3	0	0	0	0
752	3	24	0.125	200	8.33333	10	20	30	3.75	0	0	0	0	0	0	0	0	0	0	0	0	3	3	3	3	0	0	0	1
756	2	17	0.117647	300	17.6471	0	70	70	8.23529	0	0	1	0	0	3	3	3	3	0	0	0	3	3	3	3	0	0	0	0
758	2	15	0.133333	400	26.6667	10	0	10	1.33333	0	0	0	0	0	0	0	0	0	0	0	0	3	0	3	0	0	0	0	0
759	3	15	0.2	500	33.3333	60	0	60	12	0	0	0	0	0	3	3	0	3	0	0	0	2	2	2	2	0	0	0	0
769	4	97	0.0412371	20000	206.186	10	20	30	1.23711	0	0	1	0	0	3	3	0	0	0	0	0	3	3	3	2	0	1	1	1
770	2	60	0.0333333	300	5	10	0	10	0.333333	0	0	0	0	0	0	0	0	0	0	0	2	3	3	2	2	0	0	0	0
771	4	56	0.0714286	280	5	10	0	10	0.714286	1	0	0	0	1	0	3	0	0	0	0	0	3	3	3	3	1	1	1	1
772	3	35	0.0857143	820	23.4286	1	1	2	0.171429	1	0	1	0	1	0	3	0	3	0	0	0	3	3	3	3	0	0	1	1
773	4	62	0.0645161	280	4.51613	0	0	0	0	1	0	0	0	1	3	3	0	0	0	0	3	3	3	0	3	0	0	0	0
775	5	290	0.0172414	700	2.41379	10	20	30	0.517241	0	0	1	0	1	3	0	0	0	0	0	0	3	3	3	3	1	1	0	1
776	5	155	0.0322581	500	3.22581	0	10	10	0.322581	0	0	1	0	1	0	0	0	0	0	0	0	0	0	0	3	1	1	1	1
777	4	190	0.0210526	2900	15.2632	0	95	95	2	1	1	0	0	1	0	0	3	0	0	0	3	3	3	0	3	0	0	0	0
778	4	207	0.0193237	500	2.41546	0	15	15	0.289855	0	0	1	0	1	0	3	3	0	0	0	0	1	2	2	3	0	0	0	1
780	6	180	0.0333333	9000	50	0	0	0	0	0	0	0	0	0	0	0	0	0	0	0	0	0	0	0	3	0	0	0	0
781	4	156	0.025641	5000	32.0513	0	0	0	0	1	1	1	0	1	0	3	3	2	0	0	3	3	3	3	2	1	1	0	0
782	4	142	0.028169	3000	21.1268	0	10	10	0.28169	1	0	0	1	1	0	0	0	0	0	3	2	2	2	3	2	0	1	0	0
787	6	401	0.0149626	3518	8.77307	0	45	45	0.673317	1	0	1	1	0	0	3	0	0	0	0	0	3	3	3	3	1	1	1	0
793	2	10	0.2	1000	100	70	0	70	14	1	1	0	0	0	0	0	0	0	0	0	0	3	0	3	0	0	0	0	0
796	2	28	0.0714286	70	2.5	10	0	10	0.714286	0	0	0	0	0	0	0	0	0	0	0	0	3	0	3	3	0	0	0	0
798	3	30	0.1	300	10	0	0	0	0	0	0	0	0	0	0	0	0	0	0	0	0	3	0	0	0	0	0	0	0
803	4	34	0.117647	30	0.882353	0	30	30	3.52941	0	0	0	0	1	2	2	0	0	0	0	0	0	0	0	0	0	0	0	0
814	2	10	0.2	20	2	50	0	50	10	1	1	1	0	0	0	0	0	2	0	2	0	1	1	1	1	0	0	0	0
818	4	73	0.0547945	2000	27.3973	0	20	20	1.09589	1	0	1	1	1	1	2	1	2	0	2	2	3	3	2	2	1	1	1	1
822	6	230	0.026087	6000	26.087	0	100	100	2.6087	1	0	0	0	0	0	0	3	0	0	0	0	3	0	0	3	0	0	0	0
823	4	125	0.032	800	6.4	0	10	10	0.32	1	0	1	0	1	0	0	0	0	0	0	0	2	3	0	0	0	0	0	0
825	5	278	0.0179856	1300	4.67626	3	12	15	0.269784	0	0	0	0	1	0	0	0	0	0	0	0	0	0	2	2	0	0	0	0
837	6	430	0.0139535	100	0.232558	0	0	0	0	0	0	1	0	1	3	0	0	0	0	0	0	3	3	3	3	1	1	1	0
838	6	900	0.00666667	1400	1.55556	5	5	10	0.0666667	0	0	1	1	0	0	3	0	0	0	0	0	3	3	3	3	1	1	1	1
839	6	867	0.00692042	100000	115.34	0	0	0	0	1	1	1	1	1	3	3	0	3	0	0	0	0	0	0	2	1	1	0	0
840	6	2037	0.00294551	31800	15.6112	0	12	12	0.0353461	1	0	1	1	1	2	2	3	2	2	1	1	1	1	1	1	0	1	0	0
842	6	479	0.0125261	13600	28.3925	0	0	0	0	1	0	0	0	0	0	3	0	0	0	0	0	3	0	3	3	0	1	0	0
843	6	590	0.0101695	12000	20.339	5	5	10	0.101695	0	0	1	0	0	0	3	0	0	0	0	0	2	2	2	2	0	1	0	0
844	6	765	0.00784314	2500	3.26797	5	10	15	0.117647	0	0	1	0	1	0	0	0	0	0	0	0	3	3	3	3	1	1	1	1
846	6	518	0.011583	1960	3.78378	0	0	0	0	0	0	0	0	1	2	3	0	0	0	2	1	0	3	2	3	0	0	0	0
848	2	11	0.181818	250	22.7273	0	30	30	5.45455	0	0	0	0	0	0	0	0	0	0	0	0	0	0	3	3	0	0	0	0
849	4	50	0.08	300	6	0	0	0	0	0	0	0	0	0	0	0	0	0	0	0	0	0	0	0	0	0	0	0	0
850	2	12	0.166667	50	4.16667	0	50	50	8.33333	0	0	0	0	0	0	0	0	0	0	0	0	3	0	0	0	0	0	0	0
856	4	50	0.08	400	8	0	20	20	1.6	0	0	0	0	0	0	0	0	0	0	0	0	2	0	0	2	0	1	0	0
859	2	30	0.0666667	200	6.66667	0	10	10	0.666667	0	0	0	0	0	0	0	0	0	0	0	0	0	0	0	2	0	0	0	0
873	2	15	0.133333	200	13.3333	0	20	20	2.66667	0	0	0	0	0	0	0	0	0	0	0	0	2	2	2	2	0	0	0	0
890	2	17	0.117647	300	17.6471	0	2	2	0.235294	0	0	1	0	0	0	0	0	0	0	1	0	0	0	3	0	1	1	0	0
894	3	30	0.1	20	0.666667	0	0	0	0	0	0	0	0	0	0	0	0	0	0	0	0	0	0	0	2	0	0	0	0
895	4	30	0.133333	10	0.333333	0	30	30	4	1	0	1	0	1	0	0	0	0	0	0	0	2	2	3	2	1	1	0	1
897	2	10	0.2	20	2	10	0	10	2	0	0	0	0	0	0	3	0	0	0	0	0	0	0	0	3	0	0	0	0
912	4	25	0.16	50	2	30	50	80	12.8	1	1	0	0	0	2	2	2	0	0	0	0	2	0	0	0	0	0	0	0
918	2	19	0.105263	300	15.7895	0	0	0	0	0	0	1	0	0	0	1	0	0	0	0	0	0	0	0	0	1	1	0	0
921	3	16	0.1875	10	0.625	20	10	30	5.625	0	0	0	0	1	0	0	0	0	0	0	0	2	0	2	2	0	0	0	0
931	2	17	0.117647	80	4.70588	30	35	65	7.64706	1	0	1	0	1	3	3	3	3	3	3	3	3	3	3	3	1	1	1	1
932	4	44	0.0909091	783	17.7955	0	10	10	0.909091	0	0	1	0	1	0	3	0	2	0	0	0	3	0	3	2	1	1	0	0
943	4	100	0.04	1000	10	0	10	10	0.4	0	0	0	0	0	0	0	0	0	0	0	0	3	0	0	2	0	0	0	0
945	4	58	0.0689655	600	10.3448	0	10	10	0.689655	0	0	0	0	0	0	0	0	0	0	0	0	3	2	2	3	0	0	0	0
948	4	81	0.0493827	300	3.7037	0	10	10	0.493827	0	0	1	0	1	0	0	0	0	0	0	0	3	3	3	3	1	1	0	0
949	3	60	0.05	90	1.5	0	0	0	0	0	0	0	0	0	0	0	0	0	0	0	0	0	0	0	3	0	0	0	0
953	3	46	0.0652174	750	16.3043	0	50	50	3.26087	1	1	1	0	1	3	2	2	3	0	3	0	3	3	3	3	1	1	1	1
955	5	150	0.0333333	1000	6.66667	0	0	0	0	1	0	0	0	0	0	0	0	0	0	0	3	0	1	0	0	0	0	0	0
956	4	130	0.0307692	100	0.769231	0	5	5	0.153846	0	0	0	0	0	0	0	0	3	0	0	0	2	2	2	2	0	0	0	0
957	5	150	0.0333333	4000	26.6667	0	15	15	0.5	1	0	0	0	0	0	3	3	0	0	0	0	2	2	2	2	0	0	0	0
958	4	180	0.0222222	500	2.77778	0	0	0	0	0	0	0	0	0	0	0	0	0	0	0	0	0	0	0	0	0	0	0	0
959	4	150	0.0266667	600	4	0	0	0	0	0	0	0	0	0	0	0	0	0	0	3	0	0	0	0	0	0	0	0	0
960	5	150	0.0333333	300	2	0	10	10	0.333333	0	0	1	0	0	0	3	0	0	0	0	0	2	2	2	0	0	0	0	0
961	6	230	0.026087	3000	13.0435	0	10	10	0.26087	0	0	0	0	0	0	0	0	0	0	0	0	2	0	0	0	0	0	0	0
962	4	152	0.0263158	3000	19.7368	0	25	25	0.657895	0	0	1	0	0	0	0	0	0	0	0	0	3	0	0	0	0	1	0	0
966	5	240	0.0208333	4000	16.6667	0	10	10	0.208333	0	0	1	0	0	0	0	0	0	0	0	0	0	0	0	3	1	0	0	0
968	4	264	0.0151515	5000	18.9394	25	0	25	0.378788	0	0	1	0	0	0	0	0	0	0	0	0	3	0	3	0	0	0	0	0
969	4	75	0.0533333	20	0.266667	0	2	2	0.106667	0	0	0	0	0	0	0	0	0	0	0	0	0	0	0	2	0	0	0	0
970	4	130	0.0307692	100	0.769231	3	0	3	0.0923077	1	0	1	1	0	0	0	0	0	0	0	3	2	0	1	3	0	0	0	0
971	5	146	0.0342466	1230	8.42466	0	0	0	0	1	1	1	0	0	2	0	0	0	2	2	2	0	0	0	0	0	0	0	0
975	4	126	0.031746	2236	17.746	0	5	5	0.15873	1	1	0	0	1	3	2	0	0	0	2	2	2	0	0	2	1	1	0	0
976	4	88	0.0454545	480	5.45455	10	15	25	1.13636	0	1	0	0	1	3	3	2	3	2	2	0	3	3	3	3	1	1	1	1
981	4	100	0.04	300	3	10	10	20	0.8	1	1	1	0	1	0	0	0	0	0	0	0	2	0	0	2	0	0	0	0
987	6	2000	0.003	4000	2	0	0	0	0	0	0	1	0	0	1	1	0	0	0	0	1	0	3	2	2	0	0	0	0
988	6	700	0.00857143	10000	14.2857	10	5	15	0.128571	0	0	0	0	1	0	3	0	0	0	0	0	2	3	3	3	1	1	0	0
989	6	720	0.00833333	500	0.694444	5	10	15	0.125	0	0	1	0	1	0	3	0	0	0	3	0	2	3	2	3	0	1	0	1
990	6	806	0.00744417	500	0.620347	5	10	15	0.111663	0	0	1	0	0	0	3	0	0	0	0	3	3	3	3	2	1	1	1	1
993	6	1791	0.00335008	37966	21.1982	0	0	0	0	1	0	1	0	1	0	3	3	0	0	2	0	0	0	2	2	1	1	1	0
995	6	500	0.012	5000	10	0	30	30	0.36	0	0	0	0	0	2	2	2	2	0	0	2	3	3	3	3	0	0	0	0
996	6	490	0.0122449	1700	3.46939	10	30	40	0.489796	0	0	1	0	0	0	0	0	0	0	0	0	3	3	3	3	0	1	1	1
997	5	296	0.0168919	2931	9.90203	10	20	30	0.506757	1	1	1	0	1	0	0	2	0	2	2	2	0	0	3	3	0	0	0	0
998	6	300	0.02	10000	33.3333	3	7	10	0.2	0	0	1	0	1	0	3	0	0	0	0	0	3	3	3	3	1	1	1	1
1003	3	16	0.1875	30	1.875	0	20	20	3.75	0	0	0	0	0	3	0	0	0	0	0	0	0	3	0	0	0	0	0	0
1017	4	38	0.105263	60	1.57895	0	10	10	1.05263	1	1	1	1	1	0	3	0	0	0	0	0	0	0	2	0	1	1	0	0
1028	5	100	0.05	800	8	0	70	70	3.5	0	0	0	0	1	1	1	0	0	0	1	0	3	2	3	3	0	0	0	0
1036	6	209	0.0287081	4651	22.2536	0	0	0	0	0	1	1	0	1	3	3	3	0	0	0	0	2	2	1	2	1	1	1	1
1047	5	170	0.0294118	1000	5.88235	0	70	70	2.05882	1	0	1	0	1	3	3	3	2	2	1	2	2	2	2	3	0	0	0	0
1048	6	320	0.01875	25000	78.125	3	0	3	0.05625	0	0	1	0	1	0	0	0	0	0	0	0	1	0	0	2	1	1	0	0
1053	5	260	0.0192308	800	3.07692	0	0	0	0	1	0	1	0	0	3	3	0	2	0	0	0	0	2	0	2	1	1	0	0
1058	6	170	0.0352941	10000	58.8235	10	0	10	0.352941	0	0	0	0	1	0	0	0	0	0	0	0	2	2	2	2	0	1	0	0
1068	5	450	0.0111111	9000	20	0	30	30	0.333333	0	0	1	0	1	3	3	0	0	0	0	0	3	3	3	3	0	0	0	0
1069	6	550	0.0109091	1000	1.81818	0	0	0	0	1	0	1	0	1	0	3	0	3	0	3	3	0	2	2	2	1	0	1	0
1070	6	300	0.02	2000	6.66667	5	5	10	0.2	0	0	0	0	0	0	3	2	0	0	2	0	2	3	3	2	0	1	0	0
1071	6	1200	0.005	5000	4.16667	10	10	20	0.1	0	0	1	0	1	0	3	0	0	0	0	0	3	3	3	3	1	1	0	0
1072	6	878	0.00683371	5000	5.69476	3	10	13	0.0888383	0	0	1	0	1	0	0	0	0	0	3	0	3	3	3	3	1	1	1	1
1074	6	600	0.01	5500	9.16667	10	10	20	0.2	1	1	1	0	0	0	3	0	0	0	0	0	3	3	3	3	1	1	0	0
1075	4	300	0.0133333	5000	16.6667	10	5	15	0.2	1	1	1	0	1	0	3	0	0	0	0	0	3	3	3	3	1	1	1	1
1077	6	1600	0.00375	3000	1.875	0	0	0	0	0	0	1	0	0	0	0	0	0	0	0	0	2	3	3	3	1	1	1	0
1078	6	638	0.00940439	5000	7.83699	0	0	0	0	1	1	1	1	1	3	3	3	3	3	3	3	3	3	3	3	1	1	1	0
1079	6	890	0.00674157	4500	5.05618	5	10	15	0.101124	1	0	1	0	1	0	3	0	0	0	0	0	2	2	2	3	1	1	1	1
1081	6	4318	0.00138953	347518	80.4812	0	35	35	0.0486336	1	0	1	0	1	0	0	0	0	2	0	0	2	2	0	0	0	1	1	0
1082	6	1000	0.006	3000	3	0	80	80	0.48	1	0	1	0	0	3	3	3	0	0	0	0	3	3	3	3	0	0	0	0
1083	6	564	0.0106383	3626	6.42908	0	0	0	0	1	0	1	0	1	0	3	0	2	0	2	1	0	3	2	3	0	1	0	0
1086	5	558	0.00896057	4900	8.78136	0	0	0	0	0	0	1	0	0	0	3	0	2	0	0	0	3	0	1	3	0	1	0	0
1087	6	652	0.00920245	4165	6.38804	0	10	10	0.0920245	0	0	0	0	1	2	3	0	0	0	1	1	3	3	3	3	0	0	0	0
1089	6	760	0.00789474	5000	6.57895	0	5	5	0.0394737	1	0	1	0	1	0	0	0	3	0	0	0	3	3	3	2	1	1	1	0
1090	6	1000	0.006	20000	20	0	0	0	0	0	0	1	0	1	0	0	0	0	0	3	0	3	3	3	3	1	1	1	1
1097	2	45	0.0444444	67	1.48889	0	30	30	1.33333	1	0	1	0	0	2	3	0	2	0	0	2	2	2	2	3	1	1	0	0
1111	6	4000	0.0015	10000	2.5	0	0	0	0	1	0	0	0	1	0	0	3	0	0	0	0	3	3	3	3	1	1	1	1
1112	2	10	0.2	70	7	0	0	0	0	0	0	0	0	0	0	0	0	0	0	0	0	3	0	0	3	0	0	0	0
1113	2	10	0.2	10	1	0	10	10	2	0	0	0	0	1	0	0	0	0	0	0	0	3	3	0	3	0	0	0	1
1120	6	1300	0.00461538	3000	2.30769	10	10	20	0.0923077	0	0	1	0	1	0	3	0	0	0	0	0	3	3	2	2	1	1	1	0
1130	6	1673	0.00358637	30000	17.9319	0	30	30	0.107591	1	1	1	0	1	3	3	3	3	3	3	3	3	3	3	3	1	1	1	1
1135	1	15	0.0666667	13	0.866667	15	15	30	2	0	0	0	0	0	0	0	0	0	0	0	0	2	0	2	2	0	0	0	0
1155	2	13	0.153846	70	5.38462	0	0	0	0	0	0	0	0	0	0	0	0	0	0	0	0	1	1	1	1	0	0	0	0
1167	3	30	0.1	70	2.33333	0	30	30	3	0	0	0	0	0	0	0	0	0	0	0	0	2	2	2	2	0	0	0	0
1182	2	26	0.0769231	300	11.5385	75	0	75	5.76923	0	0	0	0	1	0	3	0	2	0	2	0	3	3	2	2	1	1	1	0
1190	3	46	0.0652174	200	4.34783	40	0	40	2.6087	0	0	1	0	1	2	0	0	2	0	0	0	3	3	3	3	1	1	1	0
1198	3	34	0.0882353	1000	29.4118	0	30	30	2.64706	0	1	0	0	0	0	0	0	0	0	2	0	3	3	0	3	0	0	0	0
1204	2	19	0.105263	5	0.263158	0	5	5	0.526316	0	0	0	0	1	0	0	0	0	2	0	0	2	2	2	2	0	0	0	1
1207	3	17	0.176471	300	17.6471	0	0	0	0	0	0	0	0	1	3	3	3	0	0	0	0	3	3	3	3	0	1	0	0
1208	3	38	0.0789474	493	12.9737	0	100	100	7.89474	0	0	1	0	0	3	0	0	0	0	0	0	0	3	0	3	0	1	0	1
1209	2	36	0.0555556	10	0.277778	0	50	50	2.77778	1	0	0	0	1	3	3	3	3	3	3	3	2	2	1	2	1	0	0	1
1213	2	25	0.08	220	8.8	0	0	0	0	1	0	0	0	0	2	0	0	0	2	0	3	0	0	1	2	0	1	0	0
1218	3	40	0.075	100	2.5	0	0	0	0	1	1	1	0	0	0	0	3	0	0	0	3	3	0	2	3	1	0	0	0
1220	2	20	0.1	1	0.05	0	35	35	3.5	0	0	0	0	1	2	3	3	3	0	0	0	3	2	3	3	0	0	0	1
1222	2	16	0.125	10	0.625	0	20	20	2.5	0	0	1	0	1	0	0	1	3	0	0	0	0	0	1	3	0	0	1	0
1223	2	14	0.142857	20	1.42857	0	20	20	2.85714	0	0	0	0	1	2	2	0	2	2	0	0	2	2	2	2	1	1	0	0
1224	3	29	0.103448	1000	34.4828	0	0	0	0	1	1	0	1	1	3	0	0	0	2	2	1	2	1	1	2	1	1	0	1
1228	2	17	0.117647	28	1.64706	0	10	10	1.17647	0	0	1	0	0	0	0	0	0	0	0	0	0	0	1	0	0	0	0	0
1237	2	15	0.133333	10	0.666667	0	0	0	0	1	1	0	0	0	2	0	0	3	3	3	0	2	2	2	3	0	0	1	0
1239	1	15	0.0666667	20	1.33333	0	20	20	1.33333	0	0	0	1	1	0	0	2	0	2	0	0	0	0	0	0	1	0	0	0
1241	4	40	0.1	250	6.25	0	2	2	0.2	0	0	1	0	1	0	2	0	2	0	0	0	2	0	2	2	1	1	0	0
1242	2	16	0.125	112	7	0	52	52	6.5	1	0	1	0	1	0	3	0	2	2	2	2	2	1	1	2	1	1	1	1
1245	2	10	0.2	20	2	5	10	15	3	0	0	0	0	1	2	3	0	3	0	0	0	3	2	3	3	0	0	0	1
1246	1	11	0.0909091	70	6.36364	15	20	35	3.18182	1	0	1	0	1	3	2	2	2	3	3	3	3	2	3	3	0	1	0	1
1253	2	28	0.0714286	50	1.78571	0	5	5	0.357143	0	0	0	1	1	2	2	2	3	3	3	2	0	0	0	0	0	0	0	0
1268	4	50	0.08	150	3	0	10	10	0.8	0	0	0	0	0	2	0	0	0	0	0	0	2	3	3	2	0	0	0	0
1279	3	59	0.0508475	700	11.8644	30	30	60	3.05085	1	0	1	0	1	0	2	3	2	2	3	3	3	2	2	2	0	0	0	0
1280	2	32	0.0625	43	1.34375	0	5	5	0.3125	0	0	0	0	1	3	2	2	2	0	2	2	2	2	2	2	0	0	0	1
1287	4	120	0.0333333	300	2.5	0	0	0	0	1	0	0	0	0	0	0	0	0	0	3	0	3	3	3	3	0	0	0	0
1291	3	80	0.0375	500	6.25	5	5	10	0.375	1	0	0	0	0	0	2	0	0	0	0	0	3	3	3	3	0	0	0	0
1294	1	140	0.00714286	50	0.357143	0	20	20	0.142857	0	0	0	0	0	0	3	0	0	0	0	0	3	3	3	3	0	0	0	0
1295	4	145	0.0275862	400	2.75862	0	30	30	0.827586	0	0	0	0	1	3	0	0	3	0	0	3	0	0	0	0	0	0	0	0
1296	5	400	0.0125	500	1.25	30	70	100	1.25	1	1	0	0	1	0	3	0	0	0	3	3	3	3	3	3	0	1	0	0
1300	4	230	0.0173913	300	1.30435	0	0	0	0	0	0	0	0	0	0	0	0	0	0	0	0	0	0	0	0	0	0	0	0
1301	5	180	0.0277778	3500	19.4444	0	25	25	0.694444	0	0	0	0	0	0	0	0	0	0	0	0	3	3	0	3	0	0	0	0
1303	4	260	0.0153846	1100	4.23077	0	10	10	0.153846	0	0	0	0	1	0	0	0	0	0	0	0	3	3	3	3	0	0	0	1
1304	2	180	0.0111111	50	0.277778	0	30	30	0.333333	0	0	0	0	0	0	0	0	0	0	0	0	2	2	0	2	0	0	0	0
1305	4	160	0.025	500	3.125	0	15	15	0.375	0	0	0	0	0	0	3	0	0	0	0	0	0	0	0	0	0	0	0	0
1307	5	203	0.0246305	1	0.00492611	0	30	30	0.738916	0	0	1	1	1	2	0	0	0	0	0	0	2	0	2	2	0	0	0	0
1309	4	225	0.0177778	300	1.33333	0	5	5	0.0888889	0	0	1	0	0	1	1	1	2	1	1	1	2	0	2	3	0	1	1	0
1310	5	143	0.034965	336	2.34965	0	70	70	2.44755	1	1	0	0	1	2	2	0	3	2	3	3	0	2	3	3	0	0	0	0
1311	5	200	0.025	2000	10	0	5	5	0.125	0	0	1	0	1	0	0	0	0	2	1	3	3	3	3	3	1	1	1	1
1312	4	126	0.031746	8444	67.0159	20	70	90	2.85714	1	1	1	1	1	2	2	2	2	2	2	2	3	3	3	3	0	1	0	0
1313	3	210	0.0142857	3	0.0142857	0	0	0	0	0	0	0	0	0	0	2	0	0	0	0	2	0	0	0	3	0	1	0	0
1317	6	335	0.0179104	500	1.49254	0	0	0	0	1	0	0	0	1	0	2	0	0	0	0	0	0	0	0	1	1	0	0	0
1327	4	40	0.1	1000	25	0	35	35	3.5	0	0	1	0	1	0	0	0	0	0	0	0	0	0	3	0	0	0	0	0
1329	3	200	0.015	200	1	0	5	5	0.075	0	0	1	1	1	0	0	0	3	3	0	0	3	3	3	3	1	1	1	1
1340	2	20	0.1	300	15	0	70	70	7	0	0	0	0	1	0	0	0	0	0	0	0	2	0	3	0	0	0	0	0
1341	2	15	0.133333	900	60	0	50	50	6.66667	0	0	0	0	1	0	0	0	0	0	0	0	3	0	3	0	0	0	0	0
1352	3	50	0.06	100	2	0	0	0	0	0	0	1	0	0	0	0	0	0	0	0	0	2	0	0	2	0	0	0	0
1358	4	48	0.0833333	120	2.5	0	30	30	2.5	0	0	1	0	0	0	3	0	3	0	0	0	3	3	3	3	0	0	0	0
1375	1	20	0.05	1000	50	0	0	0	0	0	0	0	0	0	2	2	2	2	0	0	0	2	2	2	0	0	1	1	1
1399	3	35	0.0857143	50	1.42857	0	50	50	4.28571	0	0	0	0	1	3	3	0	0	0	0	0	0	0	2	2	0	1	1	1
1413	2	12	0.166667	9	0.75	0	20	20	3.33333	0	0	0	0	1	0	2	0	0	0	0	2	2	2	2	3	1	0	0	1
1421	2	13	0.153846	100	7.69231	0	0	0	0	1	1	0	0	1	0	2	0	0	0	0	0	3	0	0	0	0	1	0	0
1427	4	120	0.0333333	1800	15	0	80	80	2.66667	0	0	0	1	1	0	0	3	0	0	0	0	3	3	3	3	0	0	0	0
1433	3	90	0.0333333	30	0.333333	0	0	0	0	0	0	0	0	0	0	3	0	0	0	0	0	0	2	3	3	1	1	0	1
1439	5	270	0.0185185	3000	11.1111	0	20	20	0.37037	1	0	0	0	0	0	0	0	3	0	0	3	0	0	2	0	0	0	0	0
1441	4	125	0.032	2000	16	0	20	20	0.64	1	0	0	0	0	2	2	2	2	2	2	3	2	2	2	2	0	0	0	0
1443	5	300	0.0166667	3000	10	0	10	10	0.166667	0	0	0	0	0	0	0	0	0	0	0	0	2	0	0	2	0	0	0	0
1444	5	120	0.0416667	300	2.5	5	10	15	0.625	1	1	0	0	0	0	0	0	0	0	2	0	3	3	2	2	0	0	0	0
1445	4	137	0.0291971	200	1.45985	0	0	0	0	1	0	1	0	1	3	2	0	2	0	0	2	2	0	2	2	1	1	0	1
1505	3	62	0.0483871	5	0.0806452	0	0	0	0	0	0	0	0	1	1	1	1	1	1	1	1	0	0	0	2	0	0	0	0
1507	4	50	0.08	500	10	0	5	5	0.4	0	0	1	1	1	3	0	0	2	0	0	1	3	2	2	2	0	1	1	0
1514	5	91	0.0549451	500	5.49451	5	5	10	0.549451	0	0	1	0	0	0	3	0	3	0	0	0	3	3	3	3	0	0	0	0
1521	4	145	0.0275862	12844	88.5793	0	20	20	0.551724	1	0	1	1	1	0	0	0	3	0	3	3	3	3	3	3	0	1	1	1
1536	3	44	0.0681818	445	10.1136	0	0	0	0	0	0	0	1	1	0	0	0	2	0	2	0	3	2	3	2	0	1	1	1
1537	2	29	0.0689655	64	2.2069	0	0	0	0	0	0	0	0	1	2	2	0	2	0	0	0	3	3	3	3	0	0	0	0
1542	4	45	0.0888889	250	5.55556	0	0	0	0	0	0	0	0	1	0	3	0	3	0	0	0	0	0	0	2	0	0	0	0
1551	4	100	0.04	1200	12	0	30	30	1.2	1	1	1	0	1	0	0	0	2	2	0	3	3	3	3	3	0	0	0	1
1565	2	29	0.0689655	100	3.44828	0	5	5	0.344828	0	0	0	0	0	0	0	0	0	0	0	0	3	0	0	0	0	0	0	0
1566	2	16	0.125	120	7.5	75	0	75	9.375	0	0	0	0	1	2	2	3	2	0	3	3	0	0	3	3	1	1	0	1
1573	2	12	0.166667	50	4.16667	0	0	0	0	0	0	0	0	1	2	0	2	0	0	0	0	1	2	1	2	0	1	0	0
1588	1	10	0.1	80	8	0	10	10	1	0	0	0	0	1	0	0	0	0	0	0	0	2	2	2	2	0	0	0	0
1602	4	30	0.133333	70	2.33333	0	10	10	1.33333	0	0	1	1	1	0	0	0	1	2	0	0	3	3	3	3	1	1	1	1
1605	4	30	0.133333	100	3.33333	0	10	10	1.33333	0	0	1	1	1	0	0	0	3	3	0	0	3	3	3	3	0	0	0	1
1630	2	18	0.111111	100	5.55556	0	0	0	0	0	0	0	0	0	0	2	2	0	0	0	0	2	2	2	2	0	0	0	0
1632	3	40	0.075	30	0.75	0	0	0	0	0	0	1	0	1	2	0	0	0	0	0	0	1	0	1	1	0	0	0	0
1643	6	300	0.02	500	1.66667	0	15	15	0.3	0	0	0	0	0	0	0	0	0	0	0	0	2	2	2	2	0	0	0	0
1647	4	118	0.0338983	300	2.54237	0	20	20	0.677966	0	0	1	1	1	0	1	0	3	2	0	0	3	3	3	3	0	0	0	0
1669	1	11	0.0909091	100	9.09091	0	0	0	0	0	0	0	0	0	0	3	0	2	0	0	0	2	2	2	0	0	0	0	0
1675	3	30	0.1	200	6.66667	0	30	30	3	0	0	0	0	0	0	0	0	3	0	0	0	3	3	3	3	0	0	0	0
1678	4	30	0.133333	200	6.66667	0	30	30	4	0	0	0	0	0	0	0	0	3	0	0	0	3	3	3	3	0	0	0	0
1686	1	16	0.0625	34	2.125	0	0	0	0	1	0	1	0	1	3	0	0	0	0	0	0	2	0	2	3	0	1	1	0
1705	4	190	0.0210526	300	1.57895	0	3	3	0.0631579	0	0	1	0	0	0	3	0	0	0	0	0	2	2	2	2	0	0	0	0
1706	4	170	0.0235294	300	1.76471	0	0	0	0	0	0	1	0	0	2	0	0	0	0	0	0	0	0	0	3	0	0	0	0
1711	4	20	0.2	300	15	0	0	0	0	0	0	0	0	0	0	0	3	0	0	0	0	0	0	0	2	0	0	0	0
1720	4	85	0.0470588	900	10.5882	0	30	30	1.41176	1	0	0	0	1	0	0	0	0	0	0	2	3	3	0	2	0	0	0	0
1723	2	10	0.2	60	6	0	20	20	4	0	0	0	0	1	0	3	0	0	0	2	0	3	2	0	3	0	0	0	0
1727	2	15	0.133333	90	6	0	0	0	0	1	1	1	0	1	2	2	2	3	0	3	2	1	2	3	2	0	1	0	0
1730	4	11	0.363636	100	9.09091	0	0	0	0	0	0	0	0	0	0	2	0	0	0	0	0	1	0	0	2	0	0	0	0
1731	3	24	0.125	80	3.33333	0	0	0	0	0	0	0	0	0	0	0	0	2	0	0	0	2	0	0	3	0	0	0	0
1732	4	41	0.097561	50	1.21951	0	0	0	0	0	0	0	0	0	0	0	0	0	0	0	0	0	0	0	3	0	0	0	0
1734	4	34	0.117647	100	2.94118	0	0	0	0	0	0	0	0	1	0	0	0	0	2	1	0	2	0	3	2	0	0	0	0
1736	2	12	0.166667	100	8.33333	0	80	80	13.3333	0	0	0	0	0	0	0	0	0	0	0	0	0	0	0	3	0	0	0	0
1738	3	17	0.176471	200	11.7647	20	0	20	3.52941	1	1	1	0	0	0	2	0	2	0	2	0	3	3	3	3	1	0	1	1
1741	3	46	0.0652174	1500	32.6087	0	8	8	0.521739	0	0	1	0	0	0	3	0	0	0	0	0	2	0	2	2	0	0	0	0
1743	3	16	0.1875	1000	62.5	0	0	0	0	0	0	0	0	0	3	0	0	0	0	0	0	0	3	3	3	0	0	0	0
1744	3	30	0.1	400	13.3333	0	8	8	0.8	1	1	1	0	0	0	0	0	0	0	3	3	3	3	0	3	0	0	0	0
1745	4	50	0.08	500	10	0	0	0	0	0	0	1	1	0	3	3	3	3	0	0	0	0	3	0	3	0	0	0	1
1748	4	40	0.1	1500	37.5	10	10	20	2	0	0	1	0	0	3	3	0	0	0	0	0	3	3	3	3	0	1	0	0
1759	2	14	0.142857	200	14.2857	0	0	0	0	1	1	1	0	1	3	2	2	2	0	0	2	3	3	3	2	0	1	1	1
1761	2	18	0.111111	10	0.555556	0	20	20	2.22222	1	1	1	0	1	2	0	0	0	0	0	0	2	2	2	3	1	1	0	0
1763	2	11	0.181818	10	0.909091	0	0	0	0	0	0	0	0	1	2	0	0	0	0	2	0	3	0	2	2	0	0	0	0
1768	2	17	0.117647	151	8.88235	0	0	0	0	0	0	0	0	0	1	3	0	2	0	0	0	3	0	2	3	1	0	0	0
1771	3	20	0.15	17	0.85	0	0	0	0	0	1	0	0	0	2	2	0	2	0	0	0	3	1	2	2	0	0	1	0
1772	2	10	0.2	100	10	0	0	0	0	0	0	1	0	1	0	3	0	0	0	0	0	0	0	0	2	0	0	0	0
1773	4	20	0.2	300	15	0	0	0	0	0	0	0	0	0	2	3	3	2	0	0	0	2	2	2	2	0	0	0	0
1778	2	20	0.1	100	5	0	0	0	0	1	1	1	1	1	2	0	0	2	2	3	3	2	2	2	2	1	1	1	1
1780	2	20	0.1	124	6.2	0	0	0	0	1	1	0	0	0	0	2	2	0	0	0	0	3	3	2	3	0	1	0	0
1781	4	39	0.102564	40	1.02564	0	0	0	0	0	0	1	0	1	1	0	2	1	0	0	0	0	0	0	0	1	1	0	1
1783	2	10	0.2	1500	150	0	30	30	6	0	0	0	0	0	0	0	0	2	0	0	0	3	0	3	0	0	0	0	0
1788	2	13	0.153846	5	0.384615	0	10	10	1.53846	1	0	0	0	0	0	0	0	0	0	0	0	0	2	0	0	0	0	0	0
1789	3	12	0.25	100	8.33333	10	20	30	7.5	1	0	0	0	0	2	2	0	0	0	0	2	2	1	2	2	0	1	0	0
1790	2	12	0.166667	133	11.0833	0	0	0	0	0	0	0	0	0	0	0	3	3	0	0	0	1	0	0	3	0	0	0	0
1791	3	22	0.136364	11	0.5	0	0	0	0	0	0	1	0	0	0	0	0	0	0	0	0	3	0	0	3	0	0	0	0
1792	2	10	0.2	10	1	0	0	0	0	0	0	0	0	0	0	0	0	2	0	0	0	2	0	0	2	0	0	0	0
1796	3	34	0.0882353	1320	38.8235	0	23	23	2.02941	1	1	1	0	1	3	3	2	2	0	2	2	3	3	3	3	1	1	1	0
1797	2	21	0.0952381	150	7.14286	0	10	10	0.952381	1	0	0	0	1	0	2	0	3	0	0	0	3	0	1	2	1	1	0	1
1799	4	51	0.0784314	400	7.84314	2	0	2	0.156863	0	0	0	0	0	0	0	0	0	0	0	0	2	0	0	2	0	0	0	0
1801	4	43	0.0930233	380	8.83721	0	0	0	0	0	0	0	0	0	2	3	0	0	0	0	2	2	2	3	3	0	0	0	0
1802	4	55	0.0727273	690	12.5455	0	10	10	0.727273	0	0	0	0	1	1	0	0	0	0	0	0	3	0	0	3	1	1	1	0
1803	2	66	0.030303	180	2.72727	0	0	0	0	0	0	0	0	0	2	3	0	2	0	0	1	2	2	3	3	0	0	0	0
1804	4	77	0.0519481	370	4.80519	0	0	0	0	0	0	0	0	0	2	2	0	2	0	0	1	3	3	3	3	0	0	0	0
1808	4	85	0.0470588	450	5.29412	20	20	40	1.88235	1	0	0	0	0	3	3	0	0	0	0	3	3	3	3	3	1	1	0	1
1811	4	85	0.0470588	300	3.52941	40	0	40	1.88235	0	0	1	0	1	0	3	0	0	0	0	0	3	0	3	3	1	1	0	1
1812	4	90	0.0444444	600	6.66667	0	0	0	0	1	0	0	0	0	0	3	0	0	0	3	0	0	3	3	3	0	1	0	1
1814	4	50	0.08	120	2.4	0	0	0	0	1	0	0	0	0	3	3	0	3	0	0	0	3	3	3	3	1	1	0	1
1817	5	80	0.0625	2000	25	0	0	0	0	0	0	0	0	1	3	3	1	2	0	0	1	2	2	2	3	0	1	0	0
1818	4	55	0.0727273	148	2.69091	0	0	0	0	1	1	1	1	0	2	0	0	0	2	2	3	2	3	3	3	1	1	0	0
1819	5	92	0.0543478	1000	10.8696	0	0	0	0	1	0	1	0	0	2	2	0	0	0	1	1	0	2	2	2	1	1	1	1
1820	5	106	0.0471698	239	2.25472	0	0	0	0	0	0	0	0	0	2	3	2	0	0	0	1	3	2	1	3	0	0	0	0
1821	4	150	0.0266667	1600	10.6667	0	2	2	0.0533333	0	0	0	1	0	3	0	0	0	0	0	0	3	0	0	2	0	0	0	0
1822	6	176	0.0340909	1500	8.52273	0	0	0	0	0	0	0	0	1	0	2	0	0	0	3	3	3	2	3	2	0	0	0	0
1823	6	128	0.046875	550	4.29688	0	0	0	0	0	0	0	0	1	0	3	0	0	0	0	1	3	2	0	3	0	0	0	0
1824	6	231	0.025974	650	2.81385	0	0	0	0	0	0	0	0	0	2	3	0	2	0	0	0	3	0	0	3	0	0	0	0
1827	6	287	0.0209059	3000	10.453	0	15	15	0.313589	0	0	0	0	0	3	3	1	2	0	0	0	3	3	0	3	0	0	0	0
1834	6	130	0.0461538	900	6.92308	0	10	10	0.461538	0	0	1	0	0	0	2	0	3	3	2	0	0	0	0	2	0	1	0	0
1835	5	152	0.0328947	300	1.97368	0	0	0	0	0	0	1	0	1	2	0	0	0	0	0	0	0	0	0	2	0	1	0	0
1838	4	200	0.02	800	4	0	0	0	0	0	0	1	0	1	2	0	0	2	3	0	0	0	0	0	3	1	1	0	0
1839	6	228	0.0263158	350	1.53509	10	0	10	0.263158	0	0	0	0	0	0	0	0	0	0	0	0	0	2	2	2	1	1	1	0
1840	5	250	0.02	2512	10.048	30	30	60	1.2	1	1	1	1	1	2	2	2	2	2	2	2	3	3	3	3	1	1	1	1
1844	6	234	0.025641	1197	5.11538	0	30	30	0.769231	1	1	1	0	0	0	2	2	2	0	2	2	2	2	2	3	0	0	0	0
1845	6	432	0.0138889	5000	11.5741	0	0	0	0	0	0	0	0	1	2	3	2	1	0	0	1	3	0	2	3	0	0	0	0
1846	6	390	0.0153846	5779	14.8179	0	0	0	0	1	1	0	0	1	0	0	0	0	0	2	2	2	0	3	3	0	1	0	1
1847	6	300	0.02	5000	16.6667	0	0	0	0	1	1	1	0	0	3	3	3	0	2	0	3	3	2	3	3	0	1	0	0
1850	2	22	0.0909091	200	9.09091	0	0	0	0	0	0	1	0	1	2	0	0	0	0	0	0	2	0	0	2	0	0	0	0
1851	2	16	0.125	999	62.4375	0	0	0	0	0	0	0	0	0	3	3	0	0	0	0	0	2	2	2	2	0	0	0	0
1855	4	55	0.0727273	5000	90.9091	0	1	1	0.0727273	1	0	0	0	1	0	0	0	0	0	0	0	3	0	0	0	0	0	0	0
1856	4	108	0.037037	1000	9.25926	0	15	15	0.555556	0	0	0	0	0	0	0	0	0	0	2	0	3	0	0	0	0	0	0	0
1857	4	91	0.043956	13000	142.857	0	0	0	0	1	0	0	0	0	0	3	3	0	0	0	0	2	2	2	2	0	0	0	0
1860	4	160	0.025	3000	18.75	0	20	20	0.5	0	0	0	0	0	0	0	0	0	0	0	0	3	0	0	0	0	0	0	0
1861	5	250	0.02	8000	32	0	10	10	0.2	0	1	0	0	0	0	0	3	0	0	0	0	3	3	3	3	0	0	0	0
1862	4	290	0.0137931	3000	10.3448	0	10	10	0.137931	0	0	0	0	0	0	0	0	0	0	0	0	3	0	0	0	0	0	0	0
1863	4	100	0.04	2000	20	0	10	10	0.4	1	0	0	0	0	0	0	0	0	0	0	0	3	0	0	0	0	0	0	0
1867	4	200	0.02	1000	5	0	5	5	0.1	0	0	0	0	0	0	0	0	0	0	0	0	2	0	2	0	0	0	0	0
1869	4	298	0.0134228	8300	27.8523	10	0	10	0.134228	1	1	0	0	0	0	0	0	0	0	0	3	2	0	2	2	0	0	0	0
1870	4	132	0.030303	4000	30.303	50	0	50	1.51515	0	0	0	0	0	0	3	0	3	0	0	0	3	3	3	3	0	0	0	0
1873	3	228	0.0131579	500	2.19298	10	10	20	0.263158	0	0	0	0	0	0	3	0	0	0	0	0	2	2	2	2	0	0	0	0
1874	4	290	0.0137931	2000	6.89655	0	10	10	0.137931	0	0	0	0	0	3	3	0	3	0	0	0	3	3	3	3	0	0	0	0
1876	4	108	0.037037	1500	13.8889	0	0	0	0	1	1	0	0	0	0	3	3	0	0	3	3	2	2	2	2	0	0	0	0
1877	4	136	0.0294118	500	3.67647	0	0	0	0	1	1	0	1	1	0	0	2	2	0	3	2	1	0	1	1	0	0	1	0
1879	5	298	0.0167785	2400	8.05369	0	20	20	0.33557	1	0	0	0	0	0	0	0	0	0	3	0	0	0	2	0	0	0	0	0
1880	5	350	0.0142857	3000	8.57143	0	0	0	0	0	0	0	0	0	0	0	0	0	0	0	0	0	0	0	0	0	0	0	0
1881	5	320	0.015625	1000	3.125	0	20	20	0.3125	1	0	0	1	0	2	0	0	2	0	0	2	0	0	2	2	1	0	0	0
1882	6	340	0.0176471	50	0.147059	0	5	5	0.0882353	1	0	0	0	0	0	0	0	0	0	0	0	0	0	0	0	1	1	1	1
1900	5	200	0.025	200	1	0	20	20	0.5	0	0	0	0	0	0	0	0	0	0	0	0	3	3	2	2	0	1	0	0
1918	3	30	0.1	100	3.33333	10	10	20	2	0	0	0	0	0	0	0	0	0	0	0	0	0	0	0	3	0	0	0	0
1927	3	18	0.166667	120	6.66667	0	0	0	0	0	0	0	0	0	0	0	0	0	0	0	0	0	2	0	2	0	0	0	0
1928	3	50	0.06	3	0.06	0	0	0	0	1	1	1	0	1	0	0	0	0	0	2	0	3	3	3	3	0	1	1	0
1935	2	32	0.0625	35	1.09375	0	0	0	0	0	0	1	0	0	2	2	0	0	2	0	0	0	2	0	0	1	1	0	0
1941	4	27	0.148148	100	3.7037	0	20	20	2.96296	0	0	1	0	0	0	3	0	0	0	0	0	3	3	3	3	0	0	0	0
1945	4	60	0.0666667	200	3.33333	0	80	80	5.33333	0	0	0	0	1	3	3	0	0	0	0	0	0	2	2	2	1	1	0	0
1959	3	29	0.103448	160	5.51724	0	0	0	0	1	0	0	0	0	3	3	0	3	0	0	0	3	3	3	3	0	0	0	0
1962	2	29	0.0689655	50	1.72414	0	20	20	1.37931	0	0	1	1	1	0	0	0	0	0	2	0	0	0	0	3	0	1	0	0
1963	2	12	0.166667	50	4.16667	0	10	10	1.66667	0	0	1	0	0	0	0	0	0	0	0	0	0	0	2	2	0	1	0	0
1968	2	15	0.133333	5000	333.333	60	0	60	8	0	0	1	0	1	3	2	0	1	2	0	0	3	3	3	3	1	1	1	0
1970	4	80	0.05	100	1.25	0	25	25	1.25	0	1	1	1	1	0	0	0	0	0	0	0	2	0	0	0	0	1	0	1
1975	3	20	0.15	100	5	0	20	20	3	0	0	1	0	0	0	0	0	0	0	3	0	3	0	0	0	0	0	0	1
1977	2	25	0.08	10	0.4	0	0	0	0	0	0	1	0	0	0	0	0	0	0	0	0	0	0	0	2	0	0	0	1
1981	2	21	0.0952381	70	3.33333	0	0	0	0	0	0	0	0	0	0	0	0	0	0	0	0	0	0	3	3	0	0	0	0
1983	3	25	0.12	200	8	0	0	0	0	1	0	1	0	0	3	0	0	0	0	0	0	0	0	0	3	0	0	1	0
1987	2	20	0.1	100	5	5	5	10	1	0	0	1	0	1	0	0	0	2	0	0	0	2	0	2	2	0	0	0	0
1998	1	30	0.0333333	300	10	0	0	0	0	0	0	0	0	0	0	0	0	0	0	0	0	0	0	0	0	0	0	0	0
2000	4	70	0.0571429	1000	14.2857	0	10	10	0.571429	1	0	0	0	0	3	0	0	0	0	0	0	0	0	0	3	0	0	0	0
2007	2	30	0.0666667	1802	60.0667	0	0	0	0	0	0	1	0	0	0	0	0	0	0	0	2	3	0	3	3	0	0	0	0
2012	2	18	0.111111	200	11.1111	30	0	30	3.33333	0	0	1	0	0	0	0	0	0	0	0	0	0	0	3	0	0	0	0	0
2016	2	48	0.0416667	260	5.41667	0	10	10	0.416667	1	0	1	0	0	0	3	0	0	0	0	0	0	0	0	3	0	1	1	0
2018	2	25	0.08	800	32	0	5	5	0.4	0	0	1	0	1	0	0	0	0	0	0	0	0	0	3	3	0	1	0	1
2023	1	20	0.05	80	4	0	0	0	0	1	0	1	0	0	0	0	0	0	0	0	2	0	0	0	3	0	0	1	0
2024	3	25	0.12	100	4	0	0	0	0	0	0	1	0	0	0	0	0	0	0	0	0	0	0	0	0	0	0	0	0
2026	3	24	0.125	200	8.33333	0	0	0	0	0	0	1	0	1	2	3	0	3	0	0	3	2	3	2	3	1	1	0	1
2039	3	25	0.12	300	12	0	0	0	0	0	0	0	0	0	0	0	0	0	0	0	0	0	2	2	2	0	0	0	0
2041	4	63	0.0634921	350	5.55556	0	30	30	1.90476	0	0	0	0	1	0	0	0	0	0	0	0	0	0	2	3	0	1	0	0
2046	4	97	0.0412371	2750	28.3505	0	0	0	0	1	1	1	0	1	3	3	3	3	0	3	3	3	3	3	3	1	1	0	0
2049	4	95	0.0421053	300	3.15789	5	0	5	0.210526	1	0	1	0	1	1	2	2	3	2	0	0	3	2	2	3	0	0	0	0
2051	4	48	0.0833333	20000	416.667	10	80	90	7.5	0	0	0	0	0	1	0	0	1	1	2	2	1	1	1	2	0	0	0	0
2052	4	57	0.0701754	3600	63.1579	40	30	70	4.91228	1	1	1	0	1	2	2	2	2	2	0	2	2	0	2	2	1	1	1	1
2053	3	58	0.0517241	117	2.01724	0	80	80	4.13793	0	1	1	1	0	3	3	0	0	3	0	0	0	0	3	3	1	1	0	0
2058	4	162	0.0246914	428	2.64198	15	0	15	0.37037	0	0	1	0	1	0	0	0	0	0	0	0	3	3	0	0	0	0	0	0
2066	5	160	0.03125	3500	21.875	0	30	30	0.9375	0	0	0	0	0	0	0	0	0	0	0	0	3	0	3	0	1	1	1	1
2070	5	190	0.0263158	1400	7.36842	0	0	0	0	1	0	0	0	0	3	3	0	3	0	0	0	0	2	2	2	0	1	0	0
2079	5	304	0.0164474	341	1.12171	0	0	0	0	1	1	0	1	0	0	3	0	1	3	0	0	0	0	0	0	1	1	1	0
2080	3	158	0.0189873	20	0.126582	0	0	0	0	0	0	1	0	1	3	3	3	2	1	1	1	1	1	1	2	1	1	0	0
2091	2	28	0.0714286	550	19.6429	0	0	0	0	0	0	1	0	1	2	1	3	3	2	1	0	3	0	3	0	0	0	0	1
2093	1	10	0.1	48	4.8	0	0	0	0	0	0	0	0	1	0	0	0	0	0	0	0	0	0	0	0	0	0	0	0
2095	4	30	0.133333	350	11.6667	0	0	0	0	0	0	0	0	0	0	0	0	0	0	0	0	0	0	0	3	0	0	0	0
2099	3	14	0.214286	150	10.7143	0	0	0	0	0	0	0	0	1	2	0	0	0	0	0	2	2	2	2	3	0	0	0	0
2102	2	10	0.2	20	2	0	0	0	0	0	0	1	0	1	2	2	2	2	0	0	0	0	0	3	3	1	0	0	0
2107	3	44	0.0681818	1	0.0227273	10	0	10	0.681818	0	0	0	0	0	0	0	0	2	0	0	0	0	0	0	2	1	1	0	0
2110	1	10	0.1	300	30	0	50	50	5	0	0	0	0	1	0	3	0	3	3	0	0	3	3	3	3	0	0	0	0
2111	2	20	0.1	100	5	40	0	40	4	0	0	1	1	1	0	0	0	0	0	0	0	3	3	3	3	1	1	1	1
2125	3	13	0.230769	150	11.5385	0	80	80	18.4615	0	0	1	1	1	0	0	3	3	3	0	0	0	0	0	3	0	0	0	0
2127	3	15	0.2	100	6.66667	0	50	50	10	0	0	0	0	0	0	3	0	3	0	0	0	2	2	2	2	0	0	0	0
2130	2	14	0.142857	150	10.7143	0	50	50	7.14286	1	0	1	1	1	3	0	0	3	0	0	3	0	3	3	3	0	0	0	0
2133	2	17	0.117647	100	5.88235	0	100	100	11.7647	0	0	0	0	0	0	0	0	3	0	0	0	0	0	0	3	0	0	0	0
2147	4	15	0.266667	200	13.3333	0	100	100	26.6667	0	0	0	0	0	0	3	3	3	0	0	0	0	0	0	3	0	0	0	0
2148	3	46	0.0652174	140	3.04348	0	50	50	3.26087	0	0	1	0	0	0	3	3	3	0	0	0	3	3	3	3	0	0	0	0
2169	2	12	0.166667	60	5	30	30	60	10	0	0	1	0	0	0	2	0	0	0	2	3	0	0	0	3	0	0	1	0
2185	3	45	0.0666667	150	3.33333	5	0	5	0.333333	0	0	0	0	0	0	0	1	0	0	1	1	0	0	3	0	0	0	0	0
2195	6	237	0.0253165	1327	5.59916	0	2	2	0.0506329	0	1	0	0	0	0	2	0	0	0	2	0	0	3	2	0	0	0	0	0
2196	6	300	0.02	200	0.666667	0	0	0	0	1	0	1	1	0	0	0	0	0	0	0	0	3	0	3	3	0	0	0	0
2202	4	106	0.0377358	960	9.0566	0	0	0	0	0	0	1	0	1	3	2	3	2	0	0	0	3	2	3	3	0	1	0	0
2208	4	120	0.0333333	500	4.16667	30	0	30	1	1	0	1	0	1	2	3	3	3	0	0	3	2	2	1	2	0	1	0	0
2252	4	53	0.0754717	1500	28.3019	0	0	0	0	0	0	1	0	0	2	2	0	0	2	0	0	2	0	0	0	0	0	0	0
2253	2	22	0.0909091	172	7.81818	0	0	0	0	0	0	0	0	0	0	0	0	0	0	2	3	0	0	0	2	0	0	0	0
2263	2	12	0.166667	42	3.5	0	0	0	0	0	0	0	0	1	1	0	0	1	1	0	1	2	1	2	2	0	1	0	0
2264	2	18	0.111111	209	11.6111	0	5	5	0.555556	1	0	0	0	0	0	2	0	2	0	0	1	1	1	1	1	1	1	0	0
2282	4	43	0.0930233	50	1.16279	0	0	0	0	0	0	1	1	1	1	0	0	0	0	0	0	0	0	0	0	0	1	0	0
2297	4	92	0.0434783	6000	65.2174	50	50	100	4.34783	1	0	1	1	1	0	0	0	0	0	2	0	2	3	3	3	0	1	1	1
2298	4	65	0.0615385	200	3.07692	3	0	3	0.184615	1	0	0	0	0	2	0	0	0	0	0	3	3	2	3	2	1	0	0	0
2301	3	53	0.0566038	10	0.188679	0	10	10	0.566038	0	0	0	0	0	0	0	0	0	0	2	0	1	0	2	2	0	0	0	0
2309	5	115	0.0434783	3500	30.4348	0	0	0	0	1	0	0	0	1	0	0	0	0	0	3	0	2	2	1	1	0	1	0	0
2312	4	168	0.0238095	300	1.78571	0	0	0	0	0	0	0	0	0	2	0	0	0	0	0	0	2	2	2	2	0	1	0	0
2317	6	100	0.06	2000	20	0	0	0	0	0	0	1	0	1	2	0	0	0	0	0	0	2	2	2	2	0	0	0	1
2318	5	147	0.0340136	11	0.0748299	0	0	0	0	0	0	0	0	0	0	0	0	0	0	0	0	0	2	0	0	0	0	0	0
2331	4	112	0.0357143	44	0.392857	0	0	0	0	0	0	1	0	0	2	0	2	2	0	1	0	0	0	0	0	0	1	0	0
2333	6	218	0.0275229	565	2.59174	0	5	5	0.137615	0	0	1	0	0	3	2	0	0	0	0	0	0	0	0	0	0	0	0	0
2334	6	125	0.048	120	0.96	0	0	0	0	1	0	1	0	0	2	3	0	3	2	2	0	0	2	2	3	1	1	0	0
2344	2	27	0.0740741	200	7.40741	0	20	20	1.48148	0	0	0	0	1	0	0	0	0	0	0	0	0	2	2	3	0	0	0	0
2346	2	10	0.2	300	30	50	50	100	20	0	0	0	0	0	0	0	0	0	0	0	0	0	0	3	3	0	0	0	0
2347	2	15	0.133333	100	6.66667	0	0	0	0	0	0	1	1	0	0	0	0	0	0	0	0	0	0	1	1	0	0	0	0
2349	3	40	0.075	800	20	0	10	10	0.75	0	0	0	0	0	0	0	0	0	0	0	0	0	2	2	2	0	0	0	0
2355	4	28	0.142857	50	1.78571	20	20	40	5.71429	0	0	0	1	0	0	0	0	0	0	2	0	3	3	3	3	0	0	0	0
2359	3	37	0.0810811	300	8.10811	0	0	0	0	0	0	0	0	0	0	0	0	0	0	0	0	0	2	2	2	0	0	0	0
2368	4	160	0.025	300	1.875	0	40	40	1	0	0	0	1	1	0	0	0	0	0	0	0	0	0	2	2	0	0	0	0
2374	2	11	0.181818	50	4.54545	0	0	0	0	0	0	0	0	0	0	0	0	0	0	0	0	0	2	0	3	0	0	0	0
2381	4	139	0.028777	300	2.15827	0	0	0	0	0	0	0	0	0	0	3	0	0	0	0	0	2	2	2	2	0	0	0	0
2394	3	48	0.0625	100	2.08333	0	0	0	0	0	0	0	0	1	0	0	0	0	0	0	0	2	2	2	2	0	0	0	0
2395	4	35	0.114286	500	14.2857	0	0	0	0	0	0	0	1	0	0	3	0	0	0	0	0	0	2	2	2	0	0	0	0
2400	3	45	0.0666667	100	2.22222	0	0	0	0	0	0	0	0	0	0	0	0	0	0	0	0	1	0	0	2	0	0	0	0
2403	3	10	0.3	200	20	0	3	3	0.9	0	0	0	0	1	0	0	0	0	0	0	0	3	3	3	3	0	0	0	0
2435	3	23	0.130435	180	7.82609	0	0	0	0	0	0	0	0	0	0	0	0	0	0	0	0	0	0	0	3	0	0	0	0
2448	3	45	0.0666667	280	6.22222	0	0	0	0	0	0	0	0	0	0	0	0	0	0	0	0	0	3	0	0	0	0	0	0
2473	3	23	0.130435	600	26.087	100	0	100	13.0435	0	0	0	0	1	0	0	0	0	0	0	0	0	3	3	3	1	0	1	0
2476	3	38	0.0789474	300	7.89474	30	0	30	2.36842	0	0	1	0	1	0	0	0	0	0	0	0	3	3	3	2	0	0	0	0
2487	1	20	0.05	63	3.15	0	100	100	5	0	0	1	0	1	1	0	0	1	0	0	0	3	0	0	3	1	1	0	0
2489	3	30	0.1	10	0.333333	0	0	0	0	0	0	1	0	1	0	2	2	2	0	2	0	3	3	0	3	1	1	0	0
2500	3	50	0.06	300	6	0	0	0	0	1	1	0	0	0	3	2	0	0	0	2	0	0	0	0	3	1	1	0	0
2517	3	22	0.136364	100	4.54545	0	2	2	0.272727	0	0	1	0	0	0	0	0	0	0	0	0	0	0	0	0	0	0	0	0
2530	1	11	0.0909091	10	0.909091	0	0	0	0	0	0	0	0	0	0	0	3	0	0	0	3	0	0	3	3	0	0	0	0
2536	2	35	0.0571429	130	3.71429	0	30	30	1.71429	0	0	1	0	0	0	0	0	0	0	0	0	0	0	3	3	0	1	0	0
2557	4	49	0.0816327	999	20.3878	0	0	0	0	0	0	0	0	0	3	3	0	3	0	0	0	2	2	2	2	0	0	0	0
2561	3	27	0.111111	140	5.18519	0	0	0	0	0	0	0	0	0	3	3	0	3	0	0	0	2	0	2	2	0	0	0	0
2564	4	46	0.0869565	538	11.6957	10	0	10	0.869565	0	1	1	0	1	0	0	0	0	0	0	2	3	0	3	3	0	0	0	0
2600	2	45	0.0444444	10	0.222222	0	80	80	3.55556	0	1	1	0	1	2	2	0	0	0	0	0	0	0	0	0	0	1	0	0
2616	2	10	0.2	500	50	0	80	80	16	0	0	1	0	0	0	0	0	0	0	0	0	0	2	0	2	0	0	0	0
2618	4	90	0.0444444	100	1.11111	0	0	0	0	0	0	0	0	0	0	0	0	0	0	0	0	1	0	0	1	0	0	0	0
2619	4	50	0.08	100	2	0	0	0	0	0	0	0	0	0	0	0	0	0	0	0	0	0	0	0	1	0	0	0	0
2620	4	129	0.0310078	200	1.55039	0	0	0	0	0	0	0	0	1	0	3	0	0	0	0	0	0	0	0	3	0	0	0	0
2621	3	50	0.06	200	4	0	0	0	0	0	0	0	0	0	0	0	0	0	0	0	0	1	3	0	3	0	0	0	0
2622	4	100	0.04	200	2	0	1	1	0.04	0	1	0	0	0	0	0	0	0	0	3	0	2	2	2	2	0	1	0	0
2623	4	200	0.02	300	1.5	0	0	0	0	1	0	1	0	1	0	3	0	0	0	0	3	2	0	0	2	0	0	0	0
2624	3	80	0.0375	300	3.75	0	0	0	0	0	0	0	0	0	0	3	0	0	0	0	1	0	2	2	2	0	0	0	0
2626	4	70	0.0571429	500	7.14286	0	0	0	0	0	0	0	0	0	0	3	0	0	0	0	0	1	1	0	1	0	0	0	0
2634	4	86	0.0465116	30	0.348837	0	0	0	0	0	0	0	0	0	0	0	0	0	0	0	0	0	3	0	0	0	0	0	0
2636	4	96	0.0416667	999	10.4062	0	0	0	0	0	0	0	0	0	3	3	0	3	0	0	0	2	2	2	2	0	0	0	0
2638	3	66	0.0454545	450	6.81818	0	0	0	0	0	0	0	0	0	3	3	0	3	0	0	0	2	0	2	2	0	0	0	0
2640	4	59	0.0677966	80	1.35593	0	0	0	0	0	0	0	0	0	3	3	0	3	0	0	0	2	2	2	2	0	0	0	0
2642	3	70	0.0428571	100	1.42857	0	0	0	0	0	0	0	0	1	0	3	0	3	0	0	0	2	2	2	2	0	0	0	0
2644	4	130	0.0307692	100	0.769231	0	0	0	0	0	0	0	0	0	0	0	0	0	0	0	2	0	0	0	0	0	0	0	0
2646	6	240	0.025	1000	4.16667	0	10	10	0.25	0	0	0	0	0	0	0	0	0	0	0	0	2	2	0	0	0	0	0	0
2647	5	220	0.0227273	200	0.909091	0	0	0	0	0	0	1	0	0	0	0	0	0	0	0	0	0	2	1	2	0	0	0	0
2650	4	100	0.04	600	6	0	10	10	0.4	0	0	0	0	0	0	0	0	0	0	0	0	0	0	0	2	0	1	0	0
2651	5	120	0.0416667	1000	8.33333	0	0	0	0	0	0	0	0	0	0	0	0	0	0	0	0	2	0	0	2	0	0	0	0
2652	4	130	0.0307692	500	3.84615	0	0	0	0	0	0	0	0	0	0	0	0	0	0	0	0	0	2	0	2	0	0	0	0
2655	6	150	0.04	240	1.6	0	15	15	0.6	0	0	0	0	0	0	0	0	0	0	0	0	0	0	2	3	0	0	0	0
2656	4	64	0.0625	900	14.0625	0	0	0	0	0	0	1	0	0	0	0	0	0	0	0	0	0	3	0	3	0	0	0	0
2659	6	130	0.0461538	6900	53.0769	0	100	100	4.61538	0	0	0	0	1	0	2	0	2	0	0	0	2	2	2	0	0	0	0	0
2661	5	129	0.0387597	1000	7.75194	0	0	0	0	0	0	0	0	0	2	2	0	2	0	0	2	2	2	2	2	0	0	0	0
2662	5	105	0.047619	300	2.85714	0	0	0	0	0	0	0	0	0	0	2	0	2	0	0	0	2	2	2	2	0	0	0	0
2672	4	135	0.0296296	80	0.592593	0	50	50	1.48148	0	0	1	0	0	0	3	0	2	0	0	0	2	2	0	2	0	0	0	0
2673	6	230	0.026087	100	0.434783	0	5	5	0.130435	0	0	0	0	1	0	0	0	0	0	0	0	2	0	0	2	1	1	0	0
2675	6	530	0.0113208	3000	5.66038	0	10	10	0.113208	0	0	0	0	0	0	0	0	0	0	0	0	2	2	2	2	0	0	0	0
2676	5	336	0.014881	240	0.714286	10	0	10	0.14881	0	0	0	0	1	0	3	0	0	0	0	0	3	0	2	3	1	0	0	1
2677	5	300	0.0166667	110	0.366667	30	0	30	0.5	0	0	0	0	0	0	3	0	0	0	0	0	0	0	2	3	0	0	0	0
2680	6	375	0.016	200	0.533333	30	30	60	0.96	1	1	1	1	0	2	0	2	2	2	2	2	2	2	2	2	0	1	0	1
2681	2	10	0.2	400	40	5	5	10	2	1	0	1	0	0	0	0	0	2	0	0	2	0	0	2	2	0	0	0	0
2682	2	14	0.142857	240	17.1429	0	0	0	0	0	0	1	0	1	0	3	0	2	0	0	0	2	2	0	2	0	0	0	0
2683	1	25	0.04	150	6	0	100	100	4	0	1	1	1	1	0	0	0	2	0	0	0	0	0	2	3	0	1	0	0
2688	3	11	0.272727	150	13.6364	0	0	0	0	0	0	0	0	0	0	2	0	2	0	0	0	0	0	2	2	0	0	0	0
2689	3	10	0.3	200	20	0	0	0	0	0	0	0	0	0	0	3	0	2	0	0	0	0	0	2	3	0	0	0	0
2691	2	10	0.2	200	20	20	30	50	10	0	0	0	0	0	0	2	0	2	0	0	0	0	3	2	3	0	0	0	0
2692	2	15	0.133333	200	13.3333	0	0	0	0	0	0	0	0	0	0	2	0	1	0	0	0	0	2	0	0	0	0	0	0
2693	2	15	0.133333	280	18.6667	0	0	0	0	0	0	1	0	0	0	3	0	2	0	0	0	0	0	2	0	0	1	0	0
2695	3	45	0.0666667	400	8.88889	0	0	0	0	0	0	0	0	0	0	3	0	0	0	0	0	0	0	2	0	0	0	0	0
2696	4	18	0.222222	60	3.33333	0	0	0	0	0	0	0	0	0	0	2	0	1	0	0	0	2	0	0	0	0	0	0	0
2698	1	10	0.1	300	30	0	0	0	0	1	1	1	0	0	0	3	0	2	0	0	0	0	0	0	1	0	0	0	0
2700	3	31	0.0967742	200	6.45161	0	0	0	0	0	0	1	0	0	0	3	0	2	0	0	0	0	0	2	0	0	1	0	1
2702	2	10	0.2	150	15	0	0	0	0	0	0	0	0	0	0	3	0	0	0	0	0	1	0	0	3	0	0	0	0
2703	3	38	0.0789474	700	18.4211	0	100	100	7.89474	1	1	1	0	0	0	3	0	0	0	0	0	3	3	3	0	0	1	0	0
2704	2	12	0.166667	250	20.8333	0	0	0	0	1	1	1	0	0	0	3	0	3	0	0	0	3	3	2	3	0	0	0	0
2706	1	34	0.0294118	150	4.41176	0	0	0	0	0	0	1	0	0	0	3	0	0	0	0	0	0	0	2	0	0	1	0	0
2708	2	26	0.0769231	2000	76.9231	10	0	10	0.769231	1	0	0	1	0	2	0	0	0	2	3	3	2	0	3	0	0	0	0	0
2710	3	30	0.1	150	5	0	100	100	10	0	0	1	1	1	0	0	3	3	3	0	0	3	3	3	3	0	0	0	1
2712	2	37	0.0540541	5000	135.135	0	10	10	0.540541	1	1	1	1	0	3	0	0	0	0	0	3	3	0	0	3	1	1	1	0
2713	2	11	0.181818	50	4.54545	0	50	50	9.09091	0	0	0	0	0	0	0	0	0	0	0	0	2	0	0	0	0	0	0	0
2714	2	13	0.153846	150	11.5385	20	0	20	3.07692	1	1	0	1	1	0	0	0	0	2	0	2	2	2	2	2	1	1	1	1
2715	3	23	0.130435	500	21.7391	0	100	100	13.0435	1	0	0	0	1	2	2	3	0	0	0	2	0	0	0	3	0	0	0	0
2716	2	19	0.105263	450	23.6842	60	5	65	6.84211	0	0	1	0	1	0	0	0	0	2	2	0	3	2	1	3	1	1	0	1
2718	2	26	0.0769231	150	5.76923	0	0	0	0	1	0	1	0	0	0	3	0	3	0	0	0	3	3	3	3	0	0	0	0
2720	2	10	0.2	200	20	100	0	100	20	0	1	0	0	0	0	0	3	0	0	0	3	3	0	3	3	0	0	0	0
2723	2	11	0.181818	10	0.909091	30	20	50	9.09091	0	1	0	0	0	0	0	0	0	0	0	0	0	3	0	0	0	0	0	0
2732	2	11	0.181818	200	18.1818	0	40	40	7.27273	1	1	1	1	1	1	0	0	1	0	0	0	3	0	3	3	1	1	1	0
2735	2	25	0.08	1000	40	0	0	0	0	1	0	0	1	0	0	0	0	0	3	0	0	0	0	3	0	0	1	1	0
2736	2	11	0.181818	200	18.1818	0	0	0	0	0	0	0	0	0	0	0	0	0	0	0	0	0	0	3	3	0	0	0	0
2738	2	16	0.125	400	25	50	50	100	12.5	1	0	0	1	1	0	0	0	0	0	0	0	0	2	0	0	0	0	0	0
2739	2	42	0.047619	20	0.47619	0	10	10	0.47619	0	0	0	0	0	0	0	0	0	0	0	0	0	0	0	0	0	0	0	0
2740	2	14	0.142857	150	10.7143	0	0	0	0	0	0	0	0	0	0	0	0	0	0	0	0	2	2	2	2	0	0	0	0
2743	2	43	0.0465116	700	16.2791	0	0	0	0	1	1	1	0	0	0	1	0	0	0	0	0	0	0	0	3	1	0	0	0
2757	3	37	0.0810811	403	10.8919	0	0	0	0	1	0	1	0	1	0	2	0	0	0	1	1	1	3	1	2	1	1	0	0
2766	2	10	0.2	1	0.1	0	0	0	0	1	1	0	0	0	0	0	0	0	0	0	0	3	3	3	0	0	1	0	0
2782	2	40	0.05	300	7.5	10	20	30	1.5	1	0	0	1	1	2	2	2	2	2	2	3	2	2	2	2	1	1	1	1
2784	3	70	0.0428571	50	0.714286	0	0	0	0	1	0	0	0	1	0	2	0	0	0	0	0	0	0	2	2	0	0	0	0
2787	4	42	0.0952381	223	5.30952	42	0	42	4	1	0	0	0	0	0	0	0	0	0	0	0	1	1	3	3	0	1	0	0
2805	3	42	0.0714286	700	16.6667	0	0	0	0	0	0	1	0	1	0	2	0	0	1	0	0	0	0	2	0	0	1	0	0
2806	4	106	0.0377358	300	2.83019	0	0	0	0	0	0	1	0	0	0	2	0	0	0	0	0	0	0	2	0	0	0	0	0
2807	3	50	0.06	600	12	0	0	0	0	0	0	1	0	0	0	2	0	0	0	0	0	2	0	0	0	0	0	0	0
2808	4	102	0.0392157	2700	26.4706	0	0	0	0	1	0	1	0	0	0	2	0	2	0	0	0	1	0	1	0	0	0	0	0
2809	2	90	0.0222222	2500	27.7778	0	0	0	0	0	0	0	0	0	0	3	0	0	0	0	0	0	0	0	2	0	0	0	0
2810	4	87	0.045977	1100	12.6437	0	10	10	0.45977	0	0	1	0	0	0	3	0	0	2	0	0	3	3	3	0	1	1	1	0
2811	5	110	0.0454545	2800	25.4545	0	0	0	0	0	0	0	0	0	0	3	0	0	0	0	0	3	3	0	0	0	1	0	0
2812	3	52	0.0576923	450	8.65385	0	10	10	0.576923	1	0	1	0	0	0	3	0	0	0	0	0	0	0	3	0	0	1	0	0
2813	3	30	0.1	250	8.33333	0	0	0	0	1	1	0	1	0	2	0	0	0	0	0	0	3	0	0	0	0	1	0	0
2814	3	55	0.0545455	100	1.81818	0	0	0	0	0	0	0	0	1	0	3	0	0	0	3	0	3	3	3	3	0	0	0	0
2815	4	53	0.0754717	350	6.60377	0	14	14	1.0566	1	0	0	0	1	2	3	0	2	0	0	1	2	3	3	2	0	1	0	0
2816	4	120	0.0333333	1500	12.5	0	10	10	0.333333	1	0	1	0	1	0	0	0	0	0	0	0	0	0	0	2	0	1	0	0
2817	4	100	0.04	1000	10	0	15	15	0.6	0	0	0	0	0	0	0	0	0	0	0	0	3	3	0	3	0	0	0	0
2821	4	70	0.0571429	9000	128.571	10	10	20	1.14286	1	1	0	0	0	0	3	0	0	0	0	0	3	3	0	3	0	0	0	0
2822	5	80	0.0625	6000	75	15	15	30	1.875	0	1	0	0	0	0	3	0	0	0	0	3	3	0	0	0	0	0	0	0
2829	4	105	0.0380952	150	1.42857	0	10	10	0.380952	1	1	1	0	1	2	2	0	0	2	2	2	2	2	2	2	1	1	1	0
2830	4	107	0.0373832	999	9.33645	40	60	100	3.73832	0	0	1	0	1	0	0	0	0	0	0	0	0	0	0	0	0	0	0	0
2831	5	82	0.0609756	2209	26.939	0	0	0	0	1	0	1	0	1	2	2	3	2	2	0	0	2	2	1	2	1	1	0	0
2833	2	55	0.0363636	20	0.363636	0	70	70	2.54545	1	0	1	0	0	3	3	3	3	0	0	0	3	3	0	3	1	1	1	0
2834	4	77	0.0519481	561	7.28571	0	0	0	0	1	1	0	1	0	2	0	0	0	0	0	0	0	0	2	0	0	0	0	0
2844	4	100	0.04	2000	20	40	40	80	3.2	1	1	1	1	1	3	0	0	0	0	3	3	3	0	3	0	0	0	0	0
2845	3	90	0.0333333	7739	85.9889	30	0	30	1	1	0	1	0	0	0	0	0	0	0	2	2	0	0	0	2	0	1	0	0
2848	3	100	0.03	230	2.3	0	15	15	0.45	1	0	0	0	1	3	0	0	0	0	0	2	2	0	1	1	1	1	0	0
2849	4	60	0.0666667	500	8.33333	10	10	20	1.33333	1	1	1	1	1	0	0	2	0	0	3	0	0	0	3	3	0	1	0	1
2850	4	76	0.0526316	120	1.57895	0	0	0	0	1	0	0	0	1	2	2	2	2	2	3	3	2	2	2	2	0	1	1	0
2852	4	60	0.0666667	100	1.66667	0	10	10	0.666667	1	1	1	0	1	3	3	3	3	3	0	2	3	0	3	3	1	1	1	1
2854	5	116	0.0431034	3000	25.8621	0	0	0	0	0	0	1	0	0	0	2	0	0	0	0	0	0	0	0	2	0	0	0	0
2855	4	110	0.0363636	1000	9.09091	0	10	10	0.363636	0	0	1	0	0	0	3	0	3	0	0	0	0	2	2	0	0	0	0	0
2857	6	183	0.0327869	4500	24.5902	0	0	0	0	0	0	0	0	0	0	2	0	0	0	0	0	0	1	1	1	0	1	0	0
2858	5	164	0.0304878	10000	60.9756	10	0	10	0.304878	1	1	1	0	1	0	3	0	0	0	0	0	0	0	1	1	1	1	1	0
2860	4	105	0.0380952	500	4.7619	0	0	0	0	0	0	1	0	0	0	2	0	2	0	0	0	3	0	0	3	0	0	0	0
2861	5	110	0.0454545	2300	20.9091	0	0	0	0	0	0	1	0	0	0	2	0	2	0	0	0	0	0	0	2	0	0	0	0
2862	4	110	0.0363636	300	2.72727	0	0	0	0	0	0	1	0	0	0	3	0	0	0	0	0	0	0	2	3	0	1	0	0
2863	4	65	0.0615385	5000	76.9231	0	0	0	0	0	0	1	0	0	0	3	0	0	0	0	0	2	0	0	0	0	1	0	0
2864	5	252	0.0198413	7100	28.1746	0	30	30	0.595238	1	0	1	0	0	0	3	0	0	0	2	2	3	3	3	3	1	1	1	0
2865	6	208	0.0288462	1100	5.28846	0	0	0	0	1	0	1	0	0	0	3	0	0	0	2	0	2	2	0	0	0	1	0	0
2866	5	285	0.0175439	26000	91.2281	0	20	20	0.350877	1	0	1	0	0	0	3	0	0	0	2	2	0	0	1	0	0	1	0	0
2869	5	101	0.049505	1750	17.3267	0	0	0	0	0	0	1	0	0	0	2	0	2	0	0	0	0	2	0	0	0	1	0	0
2871	4	167	0.0239521	620	3.71257	0	0	0	0	0	0	1	0	0	0	2	0	0	0	0	0	0	3	2	0	0	1	0	0
2872	4	208	0.0192308	130	0.625	0	0	0	0	0	0	1	0	0	0	2	0	1	0	0	0	0	2	2	3	0	0	0	0
2873	5	200	0.025	5126	25.63	0	0	0	0	0	0	1	0	0	0	3	0	0	0	0	0	0	0	0	2	0	1	0	0
2874	4	130	0.0307692	990	7.61538	0	0	0	0	0	0	0	0	0	0	3	0	2	0	0	0	3	0	0	0	0	0	0	0
2877	4	130	0.0307692	1000	7.69231	0	0	0	0	0	0	1	0	0	0	0	0	0	0	0	0	0	0	0	2	0	0	0	0
2879	5	200	0.025	800	4	0	20	20	0.5	0	0	0	0	0	0	0	0	2	0	0	0	2	2	2	2	0	0	0	1
2881	4	120	0.0333333	1000	8.33333	0	30	30	1	0	0	1	1	1	0	3	0	3	2	0	0	2	2	2	2	0	0	0	0
2883	4	200	0.02	300	1.5	0	10	10	0.2	0	0	0	0	0	0	3	0	3	0	0	0	3	3	3	3	1	1	1	0
2884	6	226	0.0265487	250	1.10619	0	5	5	0.132743	0	0	1	1	1	0	3	0	3	3	0	0	3	3	3	3	0	0	0	0
2886	6	170	0.0352941	1500	8.82353	0	80	80	2.82353	0	0	1	1	1	0	3	0	3	2	0	0	3	3	3	3	0	0	0	1
2887	4	68	0.0588235	200	2.94118	0	10	10	0.588235	0	0	1	1	1	0	0	3	3	3	0	0	3	3	3	3	0	0	0	0
2888	4	210	0.0190476	1500	7.14286	0	0	0	0	1	1	1	0	1	0	2	2	2	0	2	2	3	0	2	2	1	1	1	0
2889	5	268	0.0186567	8078	30.1418	20	30	50	0.932836	1	1	1	1	0	2	2	2	2	2	2	2	3	3	3	3	0	0	1	0
2892	4	120	0.0333333	50000	416.667	0	0	0	0	0	0	1	0	1	0	3	0	0	0	0	0	2	0	0	2	0	0	0	0
2898	2	245	0.00816327	30	0.122449	20	20	40	0.326531	1	0	0	0	1	2	2	0	0	2	0	0	2	2	2	3	1	1	0	0
2902	6	435	0.0137931	9000	20.6897	0	40	40	0.551724	0	0	1	0	0	0	0	0	2	0	0	0	2	2	2	2	0	1	0	1
2903	5	374	0.013369	13500	36.0963	0	0	0	0	0	0	1	0	0	0	3	0	0	0	0	0	0	0	0	2	0	1	0	0
2904	6	423	0.0141844	25000	59.1017	0	0	0	0	1	0	1	0	0	0	3	0	2	0	0	0	3	3	2	3	0	1	0	0
2905	4	135	0.0296296	2100	15.5556	0	0	0	0	1	0	1	0	0	2	3	0	3	0	0	0	0	2	0	2	0	0	0	0
2906	6	240	0.025	2000	8.33333	0	0	0	0	0	0	1	0	0	0	0	0	0	0	0	0	3	0	0	2	0	0	0	0
2907	6	500	0.012	10000	20	0	0	0	0	0	0	1	0	0	0	3	0	0	0	0	0	3	0	3	3	1	1	0	0
2908	6	357	0.0168067	8116	22.7339	0	90	90	1.51261	1	1	1	0	1	0	3	0	1	0	2	2	0	2	1	3	1	1	1	1
2916	2	13	0.153846	100	7.69231	0	0	0	0	0	0	1	1	1	0	3	0	0	0	0	0	2	2	3	3	0	0	0	0
2917	2	12	0.166667	200	16.6667	0	0	0	0	0	1	0	0	0	0	3	0	0	0	0	0	3	3	3	3	0	0	0	0
2920	2	33	0.0606061	200	6.06061	0	0	0	0	0	0	0	0	0	3	0	0	0	0	0	0	3	3	3	3	0	1	0	1
2921	3	60	0.05	300	5	35	50	85	4.25	1	0	0	0	0	0	3	0	0	0	0	0	3	3	3	2	0	0	0	0
2922	4	50	0.08	200	4	0	10	10	0.8	1	0	0	0	1	0	0	0	0	0	0	0	3	3	3	3	0	1	1	0
2923	2	18	0.111111	200	11.1111	0	20	20	2.22222	0	0	0	0	0	0	0	0	0	0	0	0	3	3	2	2	0	1	0	1
2924	3	11	0.272727	30	2.72727	0	30	30	8.18182	1	0	0	0	0	0	3	0	0	0	0	0	0	0	0	3	0	0	0	0
2926	2	10	0.2	300	30	20	0	20	4	0	0	0	0	1	0	0	0	0	0	0	0	2	2	2	2	0	0	0	0
2927	2	10	0.2	200	20	5	10	15	3	0	0	0	0	0	0	3	0	0	0	0	0	2	3	3	3	0	0	0	1
2929	3	18	0.166667	999	55.5	0	0	0	0	0	0	0	0	0	0	0	0	0	0	3	0	3	3	2	2	1	1	0	0
2931	3	14	0.214286	500	35.7143	0	0	0	0	0	0	1	0	0	0	0	0	0	3	0	0	3	3	3	3	0	0	0	1
2937	2	36	0.0555556	500	13.8889	0	20	20	1.11111	0	0	0	0	1	0	2	0	2	0	0	0	3	3	1	3	0	0	0	0
2939	2	15	0.133333	200	13.3333	5	5	10	1.33333	0	0	0	0	1	0	0	0	0	0	0	0	3	3	3	3	0	0	0	0
2941	2	45	0.0444444	500	11.1111	0	40	40	1.77778	1	0	1	1	1	1	2	0	0	0	2	0	2	0	0	3	1	1	0	0
2942	2	11	0.181818	200	18.1818	0	0	0	0	0	0	0	0	0	0	2	0	2	0	0	0	3	3	3	3	0	0	0	0
2944	4	56	0.0714286	85	1.51786	0	0	0	0	0	0	0	0	0	0	0	3	0	0	2	2	2	2	0	2	0	0	0	0
2946	2	29	0.0689655	49	1.68966	0	5	5	0.344828	0	0	0	1	1	0	3	0	2	0	0	0	3	0	3	3	0	0	0	1
2957	2	12	0.166667	300	25	20	20	40	6.66667	0	0	0	0	0	0	3	0	0	0	0	0	3	3	3	3	0	0	0	0
2958	1	16	0.0625	28	1.75	0	30	30	1.875	0	0	1	1	1	0	2	0	2	0	0	0	2	0	0	2	0	0	1	0
2959	2	10	0.2	300	30	2	2	4	0.8	0	0	1	0	0	0	0	0	0	0	0	0	0	2	2	2	0	0	0	0
2962	2	18	0.111111	150	8.33333	30	40	70	7.77778	1	0	0	0	1	3	0	0	3	0	0	0	3	0	3	3	0	1	1	0
2979	2	12	0.166667	50	4.16667	0	50	50	8.33333	1	0	0	0	1	0	2	0	3	0	2	0	3	3	3	1	0	0	0	0
2983	3	30	0.1	200	6.66667	0	10	10	1	0	1	1	0	1	0	3	0	0	0	0	0	3	3	3	3	0	1	0	0
2993	3	94	0.0319149	500	5.31915	0	20	20	0.638298	1	0	0	0	0	0	3	0	0	0	0	0	3	2	2	2	0	1	0	0
2994	5	280	0.0178571	2000	7.14286	10	30	40	0.714286	1	0	0	0	1	0	3	0	0	0	0	0	3	3	3	3	0	1	0	1
2995	4	203	0.0197044	2200	10.8374	0	20	20	0.394089	0	0	1	0	1	0	3	0	0	0	0	0	3	3	3	3	0	1	1	1
2996	4	200	0.02	3000	15	10	10	20	0.4	1	0	1	0	1	0	3	0	0	3	2	0	3	2	2	2	0	1	0	1
2997	5	160	0.03125	100	0.625	0	0	0	0	1	1	1	0	1	0	3	0	0	0	0	0	3	3	3	2	0	1	1	1
2999	5	150	0.0333333	2500	16.6667	0	0	0	0	0	0	1	0	0	0	2	3	0	0	0	0	3	3	3	3	0	0	0	0
3000	4	180	0.0222222	1500	8.33333	10	20	30	0.666667	1	0	1	0	1	0	3	0	3	0	3	3	3	3	3	3	1	1	0	0
3001	5	271	0.0184502	3000	11.0701	3	0	3	0.0553506	1	1	1	0	1	3	3	0	3	0	0	3	3	3	3	3	0	1	1	0
3002	3	40	0.075	130	3.25	0	0	0	0	0	0	0	0	0	0	3	0	0	0	3	0	3	3	3	3	0	0	0	1
3004	5	179	0.027933	4500	25.1397	0	10	10	0.27933	1	1	1	0	1	0	3	0	0	0	0	0	3	0	0	3	0	1	0	0
3005	5	182	0.0274725	5573	30.6209	0	73	73	2.00549	1	1	1	0	1	3	3	0	0	0	3	1	3	3	3	3	1	1	1	1
3006	4	120	0.0333333	300	2.5	0	0	0	0	1	0	0	0	1	3	3	2	2	0	0	0	3	2	2	3	1	1	0	1
3007	4	175	0.0228571	20	0.114286	0	20	20	0.457143	1	1	0	0	1	0	0	0	0	0	0	0	2	0	0	2	0	1	0	0
3008	4	115	0.0347826	200	1.73913	0	0	0	0	1	0	1	0	0	2	2	0	2	0	2	0	3	0	3	3	1	1	0	1
3016	4	30	0.133333	20	0.666667	0	20	20	2.66667	1	0	1	0	0	0	0	0	0	0	0	2	0	0	0	0	0	0	0	0
3017	2	15	0.133333	200	13.3333	30	0	30	4	0	0	1	0	0	0	0	0	0	0	0	0	3	0	0	0	0	1	0	0
3018	1	15	0.0666667	50	3.33333	100	0	100	6.66667	0	0	0	0	0	0	0	0	0	0	0	0	0	0	0	3	0	0	0	0
3020	3	18	0.166667	200	11.1111	0	50	50	8.33333	0	0	0	0	0	3	0	0	0	0	0	0	3	0	0	3	0	0	0	0
3021	2	11	0.181818	100	9.09091	20	0	20	3.63636	0	0	0	0	0	0	0	0	0	0	0	0	0	0	0	3	0	0	0	0
3023	2	14	0.142857	300	21.4286	0	50	50	7.14286	0	0	0	0	0	0	0	0	0	0	0	0	0	0	0	3	0	0	0	0
3025	3	30	0.1	290	9.66667	0	5	5	0.5	0	0	0	0	0	3	3	3	0	0	0	0	0	3	0	0	0	0	0	0
3028	2	35	0.0571429	350	10	0	100	100	5.71429	0	0	0	1	0	3	0	0	0	0	0	0	0	3	0	0	0	0	0	0
3029	2	17	0.117647	300	17.6471	0	30	30	3.52941	0	0	0	0	0	0	0	0	0	0	0	0	2	0	0	3	0	0	0	0
3032	3	40	0.075	2300	57.5	0	50	50	3.75	0	0	1	0	0	0	0	0	0	0	0	3	0	0	3	0	0	0	0	0
3033	3	30	0.1	700	23.3333	30	0	30	3	0	0	1	0	0	0	0	0	0	0	0	0	3	3	3	3	0	0	0	1
3036	2	20	0.1	200	10	0	10	10	1	0	0	1	0	0	0	0	0	0	0	0	0	3	3	3	3	0	0	0	0
3037	3	22	0.136364	100	4.54545	0	90	90	12.2727	0	0	1	0	0	0	0	0	0	0	0	0	0	0	0	3	0	0	0	0
3042	2	17	0.117647	80	4.70588	0	10	10	1.17647	1	0	0	0	0	0	0	0	0	0	0	3	3	3	3	3	0	0	0	0
3045	2	20	0.1	600	30	0	20	20	2	0	0	1	0	0	0	0	0	0	0	0	3	2	2	2	2	0	0	0	0
3049	4	48	0.0833333	159	3.3125	0	85	85	7.08333	0	0	0	0	0	3	3	0	2	0	0	0	0	2	2	3	1	1	1	0
3052	2	20	0.1	40	2	0	20	20	2	0	1	1	0	0	2	0	2	2	0	0	0	2	2	2	2	0	1	1	0
3055	2	20	0.1	150	7.5	0	50	50	5	1	0	0	0	0	0	0	0	0	0	2	0	2	2	2	0	0	0	0	0
3057	2	17	0.117647	20	1.17647	0	15	15	1.76471	1	0	1	0	1	0	0	0	2	0	0	0	2	2	2	2	0	1	1	0
3058	2	10	0.2	250	25	20	0	20	4	0	0	0	0	0	0	0	0	0	0	0	0	0	2	2	2	0	1	0	1
3060	2	12	0.166667	120	10	0	45	45	7.5	0	0	1	0	1	0	0	0	0	0	0	0	3	2	1	3	1	0	0	0
3064	2	12	0.166667	274	22.8333	0	0	0	0	0	0	1	1	1	0	0	0	0	0	0	0	2	2	2	2	0	0	0	0
3066	2	20	0.1	200	10	15	0	15	1.5	0	1	1	0	0	3	3	0	3	0	0	0	2	2	2	2	0	0	0	0
3069	3	30	0.1	500	16.6667	0	0	0	0	0	0	1	0	1	0	3	0	0	0	0	0	0	0	3	3	0	0	0	0
3070	4	42	0.0952381	250	5.95238	10	10	20	1.90476	0	0	0	0	1	0	0	0	0	0	0	0	2	2	2	2	0	0	0	0
3076	2	10	0.2	47	4.7	1	50	51	10.2	1	0	1	1	1	0	3	0	2	0	0	0	3	0	0	3	1	0	0	0
3080	2	10	0.2	30	3	0	3	3	0.6	0	0	0	0	1	0	0	0	0	0	0	0	2	0	2	2	0	0	0	1
3083	1	10	0.1	40	4	0	0	0	0	0	1	1	0	0	0	0	0	0	0	0	0	0	0	2	2	0	0	0	0
3085	3	39	0.0769231	487	12.4872	5	3	8	0.615385	0	1	1	0	1	2	0	3	2	2	2	2	2	2	1	2	1	1	1	1
3088	2	14	0.142857	5	0.357143	0	0	0	0	1	0	0	1	0	0	0	0	0	0	3	0	0	0	0	0	0	0	0	0
3098	4	45	0.0888889	400	8.88889	10	10	20	1.77778	0	0	1	0	1	0	0	2	0	0	0	0	3	3	3	3	1	0	0	0
3104	4	27	0.148148	836	30.963	5	15	20	2.96296	0	0	1	0	0	2	0	0	2	0	0	0	2	2	2	3	1	1	1	0
3116	2	35	0.0571429	435	12.4286	0	50	50	2.85714	1	1	1	1	1	0	0	0	3	0	0	0	2	2	2	2	1	1	1	1
3117	1	24	0.0416667	100	4.16667	0	10	10	0.416667	1	1	0	0	1	0	0	0	0	0	0	0	2	0	0	0	0	0	0	0
3120	2	12	0.166667	30	2.5	0	15	15	2.5	0	0	0	0	0	0	0	0	0	0	0	0	0	0	0	2	0	0	0	0
3121	2	13	0.153846	13	1	0	0	0	0	0	0	1	0	0	2	0	0	0	0	0	0	0	2	0	0	0	0	0	0
3133	4	30	0.133333	441	14.7	0	0	0	0	1	0	1	0	0	0	2	2	0	2	2	2	3	2	1	3	1	1	0	0
3136	4	70	0.0571429	200	2.85714	0	20	20	1.14286	0	0	0	0	0	0	0	0	0	0	0	0	3	0	0	3	0	0	0	0
3137	4	97	0.0412371	500	5.15464	0	20	20	0.824742	0	0	0	0	0	3	0	0	0	0	0	0	3	3	3	3	0	0	0	0
3139	4	130	0.0307692	300	2.30769	10	0	10	0.307692	0	0	1	0	0	0	0	0	0	0	0	0	3	3	3	3	0	0	0	0
3140	3	60	0.05	330	5.5	5	0	5	0.25	0	0	0	0	0	0	3	0	0	0	0	0	3	3	3	3	0	0	0	0
3141	4	70	0.0571429	490	7	0	30	30	1.71429	1	1	0	1	0	0	3	0	0	0	0	0	3	3	3	3	0	0	0	0
3144	5	80	0.0625	10	0.125	0	0	0	0	0	0	0	0	0	0	3	0	0	0	0	0	3	3	3	3	0	0	0	0
3146	3	49	0.0612245	200	4.08163	0	0	0	0	1	0	0	0	0	3	3	3	0	0	0	0	2	2	2	2	0	0	0	0
3148	4	84	0.047619	3700	44.0476	0	0	0	0	0	0	1	0	1	0	3	0	0	0	0	0	2	2	2	2	0	0	0	0
3149	4	90	0.0444444	1000	11.1111	0	3	3	0.133333	1	0	1	0	1	3	3	3	3	0	0	0	3	3	3	3	0	1	0	0
3151	4	61	0.0655738	532	8.72131	0	5	5	0.327869	1	1	0	0	0	0	0	2	0	0	0	0	0	0	0	2	0	0	0	0
3153	5	62	0.0806452	600	9.67742	0	0	0	0	0	0	1	0	0	0	0	0	2	0	0	0	0	0	0	0	1	1	1	0
3155	4	25	0.16	2000	80	0	5	5	0.8	0	0	1	0	1	0	3	0	3	0	0	0	3	0	3	3	0	0	0	0
3156	4	90	0.0444444	460	5.11111	0	0	0	0	0	0	1	0	1	3	3	0	0	0	0	0	3	3	3	3	0	1	1	1
3169	6	90	0.0666667	2000	22.2222	0	30	30	2	0	0	0	0	0	0	0	0	0	0	0	0	3	0	0	2	0	0	0	0
3170	4	100	0.04	2380	23.8	0	30	30	1.2	0	0	0	0	0	0	3	2	0	0	0	0	3	0	0	0	0	0	0	0
3171	4	150	0.0266667	1000	6.66667	0	0	0	0	0	0	0	0	0	0	0	3	0	0	0	0	0	0	0	0	0	0	0	0
3172	5	110	0.0454545	5000	45.4545	10	0	10	0.454545	0	0	1	0	0	0	3	0	0	0	0	0	3	3	3	3	0	0	0	0
3173	4	230	0.0173913	500	2.17391	0	20	20	0.347826	0	0	0	0	0	0	0	0	0	0	0	0	3	3	3	3	0	0	0	0
3174	5	160	0.03125	1900	11.875	10	0	10	0.3125	1	0	1	1	0	0	0	0	0	0	0	0	3	3	3	3	1	1	1	0
3175	5	240	0.0208333	2000	8.33333	0	0	0	0	1	0	0	0	0	3	3	3	3	0	0	3	3	0	0	0	0	0	0	0
3176	5	190	0.0263158	800	4.21053	0	0	0	0	1	0	0	1	0	0	3	0	0	0	0	0	3	0	0	0	0	0	0	0
3177	4	150	0.0266667	2000	13.3333	0	0	0	0	0	0	1	0	0	0	0	0	0	0	0	0	0	0	3	0	0	0	0	0
3178	5	140	0.0357143	1000	7.14286	0	50	50	1.78571	0	0	0	0	1	0	3	0	0	0	0	0	3	0	0	0	0	0	0	0
3180	3	150	0.02	250	1.66667	0	0	0	0	0	0	1	0	0	0	0	0	3	0	0	0	3	3	3	3	0	0	0	0
3181	4	100	0.04	1000	10	0	5	5	0.2	0	0	1	0	0	0	0	0	0	0	0	0	3	0	0	0	0	0	0	0
3182	6	272	0.0220588	2400	8.82353	0	10	10	0.220588	1	0	1	1	1	0	0	0	0	0	3	0	3	0	0	0	0	0	0	0
3187	4	180	0.0222222	60	0.333333	0	0	0	0	0	0	0	0	0	3	0	0	0	0	0	0	0	0	0	0	0	0	0	0
3189	4	240	0.0166667	500	2.08333	1	1	2	0.0333333	0	0	0	0	1	0	3	0	3	0	0	0	3	3	3	3	0	0	0	0
3190	5	350	0.0142857	5000	14.2857	20	40	60	0.857143	1	1	1	0	0	0	0	0	0	0	0	0	2	3	3	3	1	1	1	0
3191	4	65	0.0615385	2000	30.7692	0	3	3	0.184615	0	0	1	0	1	0	3	0	3	0	0	0	3	3	3	3	1	1	0	1
3193	6	234	0.025641	6670	28.5043	0	80	80	2.05128	1	1	1	1	1	2	2	0	3	0	2	2	2	3	2	2	1	1	1	0
3196	4	61	0.0655738	200	3.27869	0	1	1	0.0655738	0	0	1	0	1	0	0	3	0	3	0	0	2	2	2	2	1	1	0	0
3206	6	400	0.015	1000	2.5	0	50	50	0.75	0	0	0	0	0	0	0	0	0	0	0	0	3	0	0	0	0	0	0	0
3207	5	250	0.02	2529	10.116	40	0	40	0.8	0	0	0	1	1	0	3	0	0	0	0	0	3	3	3	3	0	0	0	0
3208	6	320	0.01875	100	0.3125	0	0	0	0	1	1	0	0	0	3	3	0	0	0	3	0	0	1	0	1	0	1	1	0
3210	6	453	0.013245	1673	3.69316	0	5	5	0.0662252	1	0	1	0	1	3	0	0	2	0	0	0	2	2	2	2	1	1	1	1
3215	3	34	0.0882353	300	8.82353	0	30	30	2.64706	0	0	0	0	1	1	1	0	0	0	1	0	2	3	1	3	0	0	0	0
3217	3	33	0.0909091	30	0.909091	0	0	0	0	0	0	0	0	0	2	3	0	0	0	0	0	3	3	1	3	0	0	0	0
3218	2	12	0.166667	250	20.8333	30	30	60	10	0	0	0	0	0	0	0	0	0	0	0	0	0	3	3	3	0	0	0	0
3222	2	11	0.181818	300	27.2727	0	20	20	3.63636	0	0	0	0	0	0	0	0	0	0	0	0	0	0	0	2	0	0	0	0
3224	2	15	0.133333	250	16.6667	0	100	100	13.3333	1	0	0	0	0	0	3	0	0	0	0	0	3	0	0	3	0	0	0	0
3227	3	25	0.12	250	10	0	50	50	6	0	0	0	0	0	0	3	0	0	0	0	0	3	0	0	3	0	0	0	0
3231	3	20	0.15	150	7.5	0	20	20	3	0	0	0	0	0	0	2	0	0	3	0	0	3	3	3	3	0	0	0	0
3233	2	15	0.133333	150	10	20	0	20	2.66667	0	0	0	0	0	0	0	0	0	0	0	0	0	0	1	0	0	0	0	0
3234	2	25	0.08	200	8	5	15	20	1.6	0	1	0	0	0	0	0	0	0	0	3	0	2	2	2	2	0	0	0	0
3236	3	20	0.15	200	10	0	10	10	1.5	0	0	1	0	0	0	0	0	0	0	0	0	0	0	0	3	0	0	0	0
3243	2	17	0.117647	200	11.7647	0	20	20	2.35294	0	0	0	0	1	0	0	0	0	0	0	0	2	2	2	2	0	0	0	0
3245	2	28	0.0714286	90	3.21429	0	0	0	0	0	0	1	0	0	0	0	0	0	0	0	0	2	2	2	2	0	0	0	0
3260	2	20	0.1	100	5	0	10	10	1	0	0	0	0	0	0	3	0	0	0	0	0	2	2	2	2	0	0	0	0
3268	2	11	0.181818	200	18.1818	0	0	0	0	0	0	1	0	0	0	2	2	0	0	0	0	0	0	0	0	0	0	0	0
3274	2	25	0.08	1000	40	0	30	30	2.4	0	0	1	0	0	0	0	0	0	0	0	0	0	0	3	3	0	0	0	0
3279	4	30	0.133333	750	25	0	10	10	1.33333	1	0	0	0	0	0	0	0	0	0	0	0	2	0	2	0	0	0	0	0
3303	3	28	0.107143	150	5.35714	0	15	15	1.60714	0	0	0	0	0	3	0	0	0	0	0	0	2	0	2	0	0	0	0	0
3309	3	33	0.0909091	300	9.09091	0	100	100	9.09091	0	0	1	0	0	0	3	0	0	0	0	0	0	3	3	3	0	0	0	0
3313	3	23	0.130435	178	7.73913	0	20	20	2.6087	0	0	1	0	0	0	0	0	0	0	0	0	2	1	1	3	1	1	0	0
3315	2	37	0.0540541	100	2.7027	1	0	1	0.0540541	0	0	1	0	0	0	0	0	0	0	0	0	2	0	2	0	0	0	0	0
3318	3	24	0.125	271	11.2917	0	20	20	2.5	0	0	0	0	1	0	3	0	0	0	0	0	0	0	0	2	0	0	0	0
3322	3	20	0.15	50	2.5	0	0	0	0	0	0	0	0	0	0	0	0	0	0	0	0	0	0	0	3	0	0	0	0
3323	4	20	0.2	323	16.15	0	20	20	4	0	0	1	0	0	2	0	0	0	0	0	0	0	0	0	2	0	1	0	0
3328	3	33	0.0909091	880	26.6667	90	0	90	8.18182	0	0	1	0	0	0	0	0	0	0	0	0	0	0	0	3	0	0	0	0
3343	1	10	0.1	100	10	0	0	0	0	1	0	0	0	1	0	0	0	0	0	0	0	0	0	0	0	0	0	1	0
3348	2	42	0.047619	200	4.7619	0	0	0	0	0	0	0	0	0	0	0	0	0	0	0	0	3	0	0	0	0	0	0	0
3351	2	10	0.2	70	7	0	0	0	0	0	0	0	0	0	0	0	0	0	0	0	0	0	0	0	2	0	0	0	0
3353	2	50	0.04	70	1.4	0	0	0	0	0	0	0	0	0	0	0	0	0	0	0	0	0	0	0	0	0	0	0	0
3358	2	18	0.111111	626	34.7778	0	80	80	8.88889	1	1	1	1	1	3	3	2	3	1	2	3	2	3	3	3	0	1	1	0
3359	2	15	0.133333	100	6.66667	0	0	0	0	0	0	1	0	0	0	0	0	0	0	0	0	0	0	0	3	0	0	0	0
3360	4	65	0.0615385	1000	15.3846	0	50	50	3.07692	0	0	1	0	0	0	0	0	0	0	0	0	2	0	2	2	1	1	0	0
3361	2	13	0.153846	300	23.0769	0	0	0	0	0	0	0	0	0	0	0	0	0	0	0	0	0	0	0	0	0	0	0	0
3365	2	17	0.117647	400	23.5294	0	0	0	0	0	0	0	0	0	0	0	0	0	0	0	0	0	0	0	3	0	1	0	0
3370	2	12	0.166667	20	1.66667	0	0	0	0	0	0	1	0	0	0	0	0	0	0	0	0	1	0	0	0	0	0	0	0
3380	1	25	0.04	10	0.4	0	0	0	0	0	0	1	0	0	0	0	0	0	0	0	0	0	0	0	2	0	0	0	0
3387	2	10	0.2	50	5	30	0	30	6	0	0	0	0	0	0	0	0	0	0	0	0	0	0	0	3	0	0	0	0
3388	2	12	0.166667	100	8.33333	0	0	0	0	0	0	0	0	1	0	0	0	0	0	0	0	0	0	0	0	0	0	1	0
3397	2	13	0.153846	10	0.769231	0	0	0	0	0	0	1	0	0	3	2	2	2	0	0	0	2	2	2	3	1	1	0	1
3409	3	24	0.125	185	7.70833	0	0	0	0	1	1	1	1	1	2	2	2	2	2	0	2	1	0	0	2	1	1	0	0
3420	2	20	0.1	32	1.6	0	15	15	1.5	1	0	1	0	0	0	3	0	0	0	0	0	0	0	0	0	0	0	0	0
3424	2	15	0.133333	200	13.3333	0	60	60	8	1	1	0	0	1	0	0	0	2	2	2	0	0	0	2	3	1	1	1	0
3425	3	28	0.107143	431	15.3929	0	30	30	3.21429	1	0	1	1	1	2	3	0	2	1	1	0	3	0	3	0	0	1	0	0
3451	2	10	0.2	1000	100	0	35	35	7	1	0	1	1	0	0	2	2	0	2	3	3	0	0	0	2	0	0	0	0
3453	2	26	0.0769231	100	3.84615	0	0	0	0	0	0	1	1	1	2	3	2	2	0	0	2	0	2	2	2	1	1	1	0
3477	4	60	0.0666667	169	2.81667	0	0	0	0	0	0	0	0	1	0	0	0	0	0	0	0	3	0	0	3	0	1	0	0
3481	2	30	0.0666667	100	3.33333	0	0	0	0	1	1	1	0	0	0	0	0	0	0	0	0	0	3	3	3	1	1	0	0
3510	3	65	0.0461538	50	0.769231	0	5	5	0.230769	0	0	0	0	0	0	0	0	0	0	0	0	2	0	0	0	0	0	0	0
3511	4	87	0.045977	500	5.74713	0	10	10	0.45977	0	0	0	0	0	0	2	2	0	2	2	2	2	2	2	2	0	0	0	0
3517	3	80	0.0375	500	6.25	0	10	10	0.375	0	0	1	0	0	0	0	0	0	0	0	0	2	0	0	0	1	0	0	0
3518	3	76	0.0394737	200	2.63158	10	0	10	0.394737	0	0	1	0	0	0	0	0	0	0	0	0	3	0	0	0	0	0	0	0
3522	2	80	0.025	70	0.875	50	0	50	1.25	0	0	0	0	0	0	0	0	0	0	0	0	3	0	0	0	0	0	0	0
3527	3	45	0.0666667	100	2.22222	5	0	5	0.333333	0	0	1	0	0	0	3	0	0	0	0	0	3	0	0	3	1	1	0	0
3529	3	48	0.0625	203	4.22917	0	0	0	0	0	0	0	0	1	2	0	0	2	0	0	0	0	1	1	2	0	1	0	0
3530	4	85	0.0470588	1306	15.3647	5	10	15	0.705882	0	0	1	0	1	2	3	0	3	0	2	0	2	2	3	3	1	1	0	0
3535	4	80	0.05	234	2.925	0	0	0	0	1	0	0	0	0	2	0	2	2	0	0	3	3	3	0	3	1	1	0	0
3536	4	76	0.0526316	250	3.28947	0	25	25	1.31579	0	0	0	0	1	2	0	0	2	0	0	0	3	2	2	2	1	1	0	0
3537	4	78	0.0512821	245	3.14103	10	12	22	1.12821	1	0	1	0	1	0	0	0	0	0	0	2	0	0	0	2	1	1	0	0
3539	4	80	0.05	300	3.75	0	0	0	0	0	0	1	1	0	2	2	0	0	0	0	0	0	1	0	2	0	0	0	0
3543	4	49	0.0816327	383	7.81633	0	0	0	0	0	0	0	0	0	2	2	2	1	0	0	0	2	2	2	3	0	1	0	0
3546	4	63	0.0634921	200	3.1746	0	30	30	1.90476	1	1	0	0	1	0	2	2	2	0	0	0	0	0	0	2	0	0	0	0
3551	4	170	0.0235294	200	1.17647	0	0	0	0	1	1	1	0	0	0	3	3	0	0	0	0	3	3	3	3	0	0	0	0
3554	4	110	0.0363636	800	7.27273	3	20	23	0.836364	0	0	0	0	0	0	0	0	0	0	3	0	0	2	0	2	0	0	0	0
3555	5	200	0.025	1000	5	0	0	0	0	0	0	0	0	0	0	0	0	0	0	0	0	0	0	0	0	0	0	0	0
3557	4	150	0.0266667	3000	20	0	5	5	0.133333	0	0	0	0	0	0	0	0	0	0	2	0	2	2	2	2	0	0	0	0
3558	5	200	0.025	500	2.5	0	50	50	1.25	0	0	0	0	0	0	3	0	0	0	0	0	0	2	0	2	0	0	0	0
3559	4	200	0.02	300	1.5	0	0	0	0	0	0	0	0	0	0	0	0	0	0	0	0	0	0	0	0	0	0	0	0
3560	5	250	0.02	1500	6	0	0	0	0	0	0	0	0	0	0	3	0	0	0	0	0	0	2	0	2	0	0	0	0
3565	4	160	0.025	7000	43.75	0	10	10	0.25	1	1	0	0	0	0	3	3	0	0	0	0	3	3	3	3	0	0	0	0
3567	4	100	0.04	3000	30	0	10	10	0.4	0	0	0	0	0	0	0	0	0	0	0	0	3	0	0	3	0	0	0	0
3569	5	150	0.0333333	200	1.33333	0	0	0	0	0	0	1	0	0	0	0	0	0	0	0	0	0	0	1	1	0	0	0	0
3575	5	170	0.0294118	724	4.25882	0	10	10	0.294118	0	0	0	0	0	0	0	0	0	0	3	3	2	0	2	2	0	1	0	0
3577	4	100	0.04	430	4.3	0	0	0	0	0	1	1	0	0	3	0	0	0	0	0	0	0	2	0	3	0	0	0	0
3580	4	78	0.0512821	100	1.28205	0	5	5	0.25641	0	0	0	0	0	0	0	0	0	0	0	0	0	0	0	2	0	1	0	0
3583	5	200	0.025	700	3.5	20	0	20	0.5	0	0	1	0	0	0	0	0	0	0	0	0	0	0	3	3	0	0	0	0
3590	6	604	0.00993377	50	0.0827815	20	0	20	0.198675	0	0	0	0	0	3	3	3	3	3	0	3	0	0	3	2	0	1	0	1
3591	4	150	0.0266667	50	0.333333	0	0	0	0	0	0	1	1	1	3	3	3	3	0	0	0	0	0	3	3	0	1	1	1
3593	4	131	0.0305344	333	2.54198	0	0	0	0	0	0	1	0	0	2	0	0	0	2	0	2	0	0	0	0	1	1	0	0
3604	3	100	0.03	30	0.3	0	0	0	0	0	0	1	0	0	2	0	0	2	0	1	2	0	2	2	2	1	1	0	0
3605	5	195	0.025641	427	2.18974	0	0	0	0	0	0	1	1	1	0	0	0	0	2	0	2	2	2	2	2	1	1	0	0
3609	4	170	0.0235294	800	4.70588	0	5	5	0.117647	0	0	0	0	0	0	0	0	2	0	0	0	2	0	2	2	0	0	0	0
3610	4	85	0.0470588	10	0.117647	0	60	60	2.82353	1	1	1	0	1	0	2	0	2	0	2	0	3	2	2	2	1	1	1	0
3614	5	278	0.0179856	1000	3.59712	0	0	0	0	1	0	0	0	0	2	2	0	2	0	0	0	2	2	2	2	1	1	0	0
3616	6	250	0.024	3000	12	0	10	10	0.24	0	0	0	0	0	2	2	2	2	2	2	2	2	2	2	2	0	0	0	0
3617	6	480	0.0125	600	1.25	0	10	10	0.125	0	1	1	0	1	0	3	0	0	0	0	0	3	3	3	3	0	0	0	0
3618	5	260	0.0192308	1000	3.84615	0	0	0	0	0	0	1	0	0	0	0	0	0	0	0	0	0	0	0	1	0	0	0	0
3619	6	198	0.030303	100	0.505051	20	20	40	1.21212	0	0	1	1	1	0	0	0	0	0	0	0	2	2	2	2	0	1	0	1
3620	6	416	0.0144231	938	2.25481	0	15	15	0.216346	0	0	0	1	0	0	0	0	0	2	0	0	2	0	0	2	0	0	0	0
3621	6	386	0.015544	816	2.11399	0	60	60	0.932642	1	1	1	1	1	2	3	0	3	0	0	0	0	0	2	3	1	1	1	0
3630	4	45	0.0888889	50	1.11111	0	10	10	0.888889	0	0	0	0	1	2	0	0	0	0	2	0	3	3	0	3	0	0	0	0
3633	3	21	0.142857	300	14.2857	0	0	0	0	0	0	0	0	0	0	0	0	0	0	0	0	2	2	0	0	0	0	0	0
3634	2	36	0.0555556	400	11.1111	0	0	0	0	0	0	0	0	0	0	3	0	0	0	0	0	2	0	0	0	0	0	0	0
3642	2	22	0.0909091	300	13.6364	0	0	0	0	0	0	0	0	0	0	0	0	0	0	0	0	2	0	0	0	0	0	0	0
3643	2	16	0.125	50	3.125	0	0	0	0	0	0	0	0	0	0	0	0	0	0	0	0	1	0	0	0	0	0	0	0
3648	2	36	0.0555556	150	4.16667	0	0	0	0	0	0	0	0	0	0	0	0	0	0	0	0	1	0	0	1	0	0	0	0
3650	3	25	0.12	40	1.6	0	0	0	0	0	0	0	0	0	0	0	0	0	0	0	0	2	0	0	0	0	0	0	0
3651	4	50	0.08	10000	200	0	0	0	0	1	0	1	0	1	2	0	0	0	0	0	0	0	2	2	3	0	0	0	0
3668	2	16	0.125	300	18.75	0	0	0	0	0	0	1	0	0	0	0	2	3	2	0	1	3	0	0	2	0	0	0	0
3675	2	35	0.0571429	15	0.428571	0	30	30	1.71429	1	1	0	1	0	2	0	1	3	0	0	2	2	0	0	3	1	0	1	1
3682	2	30	0.0666667	20	0.666667	0	10	10	0.666667	1	1	0	0	0	2	2	2	2	2	2	2	1	1	1	1	0	0	0	0
3683	3	35	0.0857143	500	14.2857	0	0	0	0	0	0	1	0	1	2	3	3	3	3	1	0	3	3	3	3	1	1	0	0
3686	3	58	0.0517241	6	0.103448	0	0	0	0	0	1	0	0	0	0	0	0	1	0	0	0	0	1	0	2	1	1	0	0
3692	2	23	0.0869565	25	1.08696	0	30	30	2.6087	1	0	0	1	0	2	2	2	0	2	2	2	0	0	0	2	0	1	0	0
3694	2	13	0.153846	20	1.53846	0	100	100	15.3846	0	0	0	0	0	0	0	0	0	0	0	3	0	0	2	3	0	0	0	0
3720	2	21	0.0952381	300	14.2857	0	1	1	0.0952381	0	0	1	1	0	3	3	2	2	0	0	0	0	0	0	0	0	0	0	0
3721	2	20	0.1	5	0.25	0	0	0	0	1	1	1	1	1	2	0	0	0	2	2	2	2	2	2	2	0	0	0	0
3723	2	51	0.0392157	1160	22.7451	0	1	1	0.0392157	0	0	0	0	0	0	0	0	0	0	0	0	0	0	1	0	0	0	0	0
3739	5	90	0.0555556	512	5.68889	5	5	10	0.555556	1	1	1	1	1	2	2	2	2	0	0	2	2	2	3	3	1	1	1	1
3741	5	110	0.0454545	100	0.909091	0	70	70	3.18182	0	1	0	0	1	0	0	1	1	1	0	0	0	0	0	0	0	0	0	0
3744	4	50	0.08	90	1.8	0	40	40	3.2	1	1	1	0	0	0	2	2	2	0	0	0	3	3	0	3	0	0	0	0
3761	4	94	0.0425532	60	0.638298	0	0	0	0	0	0	0	0	0	0	0	0	3	0	0	0	0	0	0	0	0	0	0	0
3762	6	180	0.0333333	3000	16.6667	0	10	10	0.333333	0	0	1	1	0	0	0	0	0	0	0	0	0	2	0	0	0	0	0	0
3765	6	280	0.0214286	7400	26.4286	0	0	0	0	1	0	1	0	0	0	3	0	2	0	0	0	2	0	0	2	0	1	0	0
3768	4	104	0.0384615	200	1.92308	0	3	3	0.115385	0	0	0	0	0	0	2	0	0	0	0	0	2	0	2	2	0	0	0	0
3786	5	120	0.0416667	800	6.66667	0	50	50	2.08333	1	0	1	0	0	1	3	3	3	3	0	1	0	0	0	0	0	0	0	0
3796	5	285	0.0175439	350	1.22807	0	0	0	0	1	1	1	1	0	3	0	0	2	0	2	0	3	3	3	3	1	1	1	0
3803	6	617	0.00972447	4784	7.75365	0	30	30	0.291734	1	0	1	0	0	2	3	3	2	0	3	3	3	2	3	3	1	1	1	0
3829	6	420	0.0142857	4500	10.7143	0	0	0	0	0	0	0	0	1	2	2	0	2	0	0	0	2	3	2	3	0	0	0	0
3830	6	393	0.0152672	2800	7.12468	0	25	25	0.381679	0	0	0	0	1	3	2	0	2	3	0	0	2	3	0	3	0	0	0	0
3831	4	81	0.0493827	180	2.22222	0	10	10	0.493827	0	0	0	0	1	2	3	0	1	0	0	0	3	3	1	3	0	0	0	0
3832	6	480	0.0125	12000	25	0	25	25	0.3125	0	0	0	0	1	3	2	0	2	0	0	0	3	3	0	3	0	0	0	0
3833	6	330	0.0181818	90	0.272727	0	80	80	1.45455	0	0	1	0	0	3	2	0	0	0	0	2	2	3	3	3	0	1	0	0
3834	6	590	0.0101695	15082	25.5627	10	10	20	0.20339	1	0	1	0	1	0	2	0	0	0	0	0	2	2	2	2	1	1	1	0
3835	6	400	0.015	800	2	0	2	2	0.03	0	0	1	1	1	0	3	3	0	0	0	2	3	3	2	3	0	0	0	0
3839	6	381	0.015748	5949	15.6142	0	0	0	0	1	0	0	0	1	0	2	0	3	0	3	3	2	0	2	2	1	1	0	0
3840	6	409	0.0146699	1100	2.68949	0	30	30	0.440098	1	1	1	0	0	3	0	0	0	0	0	0	2	2	2	2	1	1	0	0
3841	6	400	0.015	5654	14.135	0	26	26	0.39	1	1	0	0	0	0	0	0	0	0	0	0	0	0	0	3	1	1	0	0
3842	6	408	0.0147059	340	0.833333	0	18	18	0.264706	1	0	1	0	1	0	2	0	2	0	2	2	2	2	2	2	1	1	1	1
3843	6	443	0.013544	7967	17.9842	20	0	20	0.27088	1	1	1	1	1	2	3	2	2	1	1	1	2	2	2	2	1	1	1	1
3862	2	16	0.125	80	5	0	0	0	0	0	0	0	0	0	0	0	0	0	0	0	0	0	0	0	0	0	0	0	0
3863	1	11	0.0909091	70	6.36364	0	0	0	0	0	0	0	0	0	0	0	0	0	0	0	0	0	1	0	0	0	0	0	0
3865	3	23	0.130435	500	21.7391	0	10	10	1.30435	0	0	0	0	0	0	0	0	0	0	0	0	2	2	2	2	0	0	0	0
3869	1	18	0.0555556	5	0.277778	0	3	3	0.166667	0	0	0	0	0	2	3	0	0	0	0	0	3	0	3	0	0	0	0	0
3902	4	75	0.0533333	1050	14	5	5	10	0.533333	0	0	1	0	1	0	0	0	0	0	0	0	3	3	3	2	0	1	0	1
3914	5	70	0.0714286	1600	22.8571	0	40	40	2.85714	0	0	1	0	0	3	3	1	1	0	0	0	0	0	0	0	0	0	0	0
3958	3	180	0.0166667	50	0.277778	0	0	0	0	0	0	1	0	0	0	0	0	3	0	0	0	0	3	0	3	0	1	0	0
3971	3	40	0.075	150	3.75	0	0	0	0	0	0	0	0	0	2	0	0	0	0	0	0	3	0	0	3	0	1	0	1
3972	2	14	0.142857	80	5.71429	0	0	0	0	1	0	0	0	0	0	3	3	0	0	0	0	3	3	2	3	0	0	0	0
3980	3	30	0.1	35	1.16667	0	0	0	0	0	0	0	0	0	2	3	0	0	2	0	0	2	3	0	3	0	1	1	0
3981	2	20	0.1	100	5	10	0	10	1	0	0	0	0	1	0	0	2	0	0	0	0	1	0	0	2	0	0	0	0
3984	4	100	0.04	500	5	20	15	35	1.4	0	0	1	0	1	0	0	3	0	0	0	0	3	3	3	3	1	1	1	1
3985	1	25	0.04	10	0.4	0	30	30	1.2	0	0	0	0	1	0	0	0	0	0	0	0	3	3	3	3	0	0	0	0
3989	3	45	0.0666667	1000	22.2222	0	30	30	2	0	0	1	0	1	0	3	0	0	0	0	0	3	3	3	3	0	0	0	0
4012	3	62	0.0483871	200	3.22581	0	0	0	0	0	0	0	0	1	0	3	0	0	0	0	0	2	2	2	3	0	0	0	0
4015	4	173	0.0231214	387	2.23699	0	10	10	0.231214	0	0	0	0	1	0	3	0	0	0	2	3	2	3	3	1	0	0	0	0
4016	5	230	0.0217391	200	0.869565	25	25	50	1.08696	0	0	1	0	1	0	3	0	0	0	0	0	3	3	3	3	0	0	0	1
4017	5	100	0.05	170	1.7	0	0	0	0	0	0	0	0	1	0	0	0	3	0	0	0	2	0	2	2	0	1	0	1
4018	6	187	0.0320856	2500	13.369	0	0	0	0	1	0	1	0	1	2	2	0	2	0	2	0	2	2	3	3	1	1	1	0
4020	2	38	0.0526316	100	2.63158	0	3	3	0.157895	0	0	1	0	1	3	0	0	0	0	2	0	2	0	1	3	0	0	0	0
4023	1	11	0.0909091	55	5	0	50	50	4.54545	0	0	0	0	1	3	0	2	0	0	0	0	3	0	0	3	0	0	0	0
4035	2	17	0.117647	50	2.94118	0	5	5	0.588235	0	0	0	0	0	0	0	0	0	0	0	0	0	3	2	2	0	0	0	0
4036	2	15	0.133333	20	1.33333	0	0	0	0	1	0	1	1	1	0	0	0	0	0	3	2	3	3	3	3	1	1	1	0
4060	3	19	0.157895	100	5.26316	0	10	10	1.57895	1	1	1	1	0	3	3	2	3	0	0	0	2	0	2	1	0	0	0	1
4062	4	95	0.0421053	250	2.63158	20	20	40	1.68421	1	1	0	0	0	3	2	0	0	0	0	0	3	0	0	3	0	0	0	0
4064	4	50	0.08	960	19.2	5	0	5	0.4	0	0	1	0	0	0	0	0	0	0	3	3	3	0	3	3	0	0	0	0
4065	4	45	0.0888889	200	4.44444	0	0	0	0	0	0	0	0	0	0	0	0	0	0	0	0	0	0	0	2	0	0	0	0
4072	6	250	0.024	1000	4	20	20	40	0.96	0	0	1	1	1	2	3	0	0	0	2	0	3	0	0	3	1	1	1	1
4074	4	70	0.0571429	100	1.42857	10	0	10	0.571429	0	0	0	0	0	0	0	0	0	0	0	0	2	0	2	2	0	0	0	0
